# Supplementary material
Source: PubMed Central journal article supplement (PMC5931369)
Supplement: NIHMS923478-supplement-1.pdf [file NIHMS923478-supplement-1.pdf]

| Human gene name | Fly gene name | Fly geneID | Fly genotype                                                                      |
|-----------------|---------------|------------|-----------------------------------------------------------------------------------|
| AAK1            | Nak           | CG10637    | w[1118]; PBac(w+mC)=WH}Nak{f04720}                                                |
| ABL             | Abl           | CG4032     | Abl[2]/TM6B, Tb[1]                                                                |
| ACVR1           | sax           | CG1891     | y[1] w[*]; sax[5]/CyO, P{w+mC}=2xTb[1]-RFP}CyO                                    |
| ACVR2B          | put           | CG7904     | ry[506] P{ry[+7.2]=PZ}put[10460]/TM6B, Tb[1]                                      |
| ADCK1           | CG3608        | CG3608     | w[1118]; PBac(w+mC)=WH}CG3608{f03261} CG4741{f03261}/CyO, P{w+mC}=2xTb[1]-RFP}CyO |
| ADCK5           | CG7616        | CG7616     | y[1] w[*]; P{w+mC}=EP}CG7616{G14668}                                              |
| AKT1            | Akt1          | CG4006     | y[1] w[67c23]; P{w+mC} y[+mDint2]=EPgy2}Akt1{EY10012}/TM6B, Tb[1]                 |
| ALK             | Alk           | CG8250     | w[1118]; Mi{ET1}Alk{MB06458}                                                      |
| ATM             | tefu          | CG6535     | w[*]; P{ry[+7.2]=neoFRT}82B tefu{atm-6} e[1]/TM6B, Tb[1]                          |
| ATR             | mei-41        | CG4252     | mei-41{RT1} f[1]/FM7c, P{w+mC}=2xTb[1]-RFP}FM7c, sn[+]                            |
| AURKA           | aur           | CG3068     | aur{87Ac-3}/TM6B, Tb[1]                                                           |
| BMPR1A          | tkv           | CG14026    | tkv[8] cn[1] bw[1] sp[1]/CyO, P{w+mC}=2xTb[1]-RFP}CyO                             |
| BMPR2           | wit           | CG10776    | bw[1]; wit{A12} st[1]/TM6B, Tb[1]                                                 |
| BRAF            | phl           | CG2845     | phl{7}/FM7c, P{w+mC}=2xTb[1]-RFP}FM7c, sn[+]                                      |
| BRD3            | fs(1)h        | CG2252     | w[67c23] P{w+mC}=lacW}fs(1)h{G0495}/FM7c, P{w+mC}=2xTb[1]-RFP}FM7c, sn[+]         |
| BRSK1           | sff           | CG6114     | w[1118]; Mi{ET1}sff{MB06603}                                                      |
| BUB1            | Bub1          | CG14030    | w[1118]; PBac(w+mC)=PB}Bub1{c04512}                                               |
| CAMK1D          | CaMKI         | CG1495     | y[1] w[67c23]; P{w+mC} y[+mDint2]=EPgy2}CaMKI{EY07197}                            |
| CAMK2D          | CaMKII        | CG18069    | y[1] w[1118]; P{w+mC} y[+mDint2]=EPgy2}CaMKII{EY14097}                            |
| CASK            | CASK          | CG6703     | w[*]; Df(3R)cak{X-313}, CASK{X-313}/TM6B, Tb[+]                                   |
| CDC42BPA        | gek           | CG4012     | P{ry[+7.2]=PZ}gek{09373} cn[1]/CyO, P{w+mC}=2xTb[1]-RFP}CyO                       |
| CDC7            | CG5790        | CG5790     | w[1118]; PBac(w+mC)=WH}CG5790{f04763}                                             |
| CDC7            | l(1)G0148     | CG32742    | w[67c23] P{w+mC}=lacW}l(1)G0148{G0148}/FM7c, P{w+mC}=2xTb[1]-RFP}FM7c, sn[+]      |
| CDK1            | cdc2          | CG5363     | cdc2{E1-23} b[1] pr[1] cn[1]                                                      |
| CDK11B          | Pitsire       | CG4268     | y[1] w[67c23]; P{w+mC} y[+mDint2]=EPgy2}Pitsire{EY22469}/TM6B, Tb[1]              |
| CDK12           | Cdk12         | CG7597     | y[1] w[67c23]; P{y[+mDint2] w[BR.E.BR]=SUPor-P}Cdk12{KG05512} ry[506]/TM6B, Tb[1] |
| CDK14           | Eip63E        | CG10579    | w[*]; Eip63E{81}/TM6B, Tb[1]                                                      |
| CDK2            | cdc2c         | CG10498    | w[*]; cdc2c{2}/TM6B, Tb[1]                                                        |
| CDK4/6          | Cdk4          | CG5072     | w[1118]; P{w+mC}=lacW}Cdk4{s4639}/CyO, P{w+mC}=2xTb[1]-RFP}CyO                    |
| CDK8            | Cdk8          | CG10572    | y[1] w[1118]; PBac(w+mC)=5HPw{f05537} Cdk8{A162}/TM6B, Tb[1]                      |
| CDK9            | Cdk9          | CG5179     | w[1118]; PBac(w+mC)=WH}Cdk9{f05537}                                               |
| CHEK1           | grp           | CG17161    | P{ry[+7.2]=PZ}grp{06034} cn[1]/CyO, P{w+mC}=2xTb[1]-RFP}CyO                       |
| CHUK            | ird5          | CG4201     | P{ry[+7.2]=Dipt2.2-lac2}3, ird5[1] ca[1]/TM6B, Tb[1]                              |
| CIT             | sti           | CG10522    | y[1]; P{y[+mDint2] w[BR.E.BR]=SUPor-P}sti{KG01697} ry[506]/TM6B, Tb[1]            |
| CSK             | csk           | CG42317    | w; FRT82B.dCsk1D8/TM6B, Tb[1]                                                     |
| CSNK1A1         | Cklalpha      | CG2028     | w[67c23] P{w+mC}=lacW}Cklalpha{G0492}/FM7c, P{w+mC}=2xTb[1]-RFP}FM7c, sn[+]       |
| CSNK1E          | cco           | CG2048     | y[1] w[*]; P{w+mC}=lacW}cco{J3B9}/TM6B, Tb[1]                                     |
| CSNK1G3         | gish          | CG6963     | y[1]; ry[506] P{y[+mDint2] w[BR.E.BR]=SUPor-P}gish{KG03891}/TM6B, Tb[1]           |
| CSNK2A1         | Cklalpha      | CG17520    | y[1] w[*]; Cklalpha{Tk}/TM6B, Tb[1]                                               |
| DDR2            | Ddr           | CG33531    | y[1] w[*]; Mi{y[+mDint2]=MIC}Ddr{MI04117}/CyO, P{w+mC}=2xTb[1]-RFP}CyO            |
| DGKE            | Dgkepsilon    | CG8657     | cn[1] P{ry[+7.2]=PZ}ox[1] Dgkepsilon{ox-1}/CyO, P{w+mC}=2xTb[1]-RFP}CyO           |
| DGKZ            | rdgA          | CG42667    | rdgA{KS60}                                                                        |
| DYRK1B          | mnb           | CG42273    | y[1] w[67c23] P{w+mC} y[+mDint2]=EPgy2}mnb{EY14320} CG12985{EY14320}              |
| DYRK4           | smi35A        | CG4551     | y[1] w[*]; Mi{y[+mDint2]=MIC}smi35A{MI04771}/CyO, P{w+mC}=2xTb[1]-RFP}CyO         |
| EGFR            | Egfr          | CG10079    | cn[1] Egfr{f2} bw[1] sp[1]/CyO, P{w+mC}=2xTb[1]-RFP}CyO                           |
| EIF2AK3         | PEK           | CG2087     | y[1] w[67c23]; P{w+mC} y[+mDint2]=EPgy2}PEK{EY09578}                              |
| EPHB1           | Eph           | CG1511     | y[1]; Mi{y[+mDint2]=MIC}Eph{MI05205}                                              |
| ERN1            | ire1          | CG4583     | w[1118]; PBac(w+mC)=WH}ire1{f02170}/TM6B, Tb[1]                                   |
| ETNK1           | eas           | CG3525     | w[1118] eas{alaE13}                                                               |
| FER             | Fps85D        | CG8874     | w[*]; P{w+mC}=lacW}Fps85D{X42}/TM6B, Tb[1]                                        |
| FGFR            | htl           | CG7223     | w[*]; htl{AB42}/TM6B, Tb[1]                                                       |
| FGFR            | btI           | CG32134    | y[1] w[67c23]; P{w+mC} y[+mDint2]=EPgy2}btI{EY01638}/TM6B, Tb[1]                  |
| FLT1            | Pvr           | CG8222     | w[1118]; PBac(w+mC)=PB}Pvr{c02195}/CyO, P{w+mC}=2xTb[1]-RFP}CyO                   |
| FRK             | Src42A        | CG44128    | w[1118]; Src42A{myri}                                                             |
| FYN_SRC         | Src64B        | CG7524     | w[1118]; PBac(w+mC)=PB}Src64B{c04709}/TM6B, Tb[+]                                 |
| GAK             | aux           | CG1107     | w[*]; aux{L7}/TM6B, Tb[1]                                                         |
| GRK5            | Gprk2         | CG17998    | ry[506] P{ry[+7.2]=PZ}Gprk2{06936} CG11337{06936}/TM6B, Tb[1]                     |
| GSK3A           | sgg           | CG2621     | sgg{M11} w[*] f[36a]/FM7c, P{w+mC}=2xTb[1]-RFP}FM7c, sn[+]                        |
| GSK3B           | gskt          | CG31003    | y[1] w[*]; Mi{y[+mDint2]=MIC}gskt{MI04964}/TM6B, Tb[1]                            |
| GUCY2D          | CG34357       | CG34357    | y[1] w[67c23]; P{w+mC} y[+mDint2]=EPgy2}CG34357{EY21024}/TM6B, Tb[1]              |
| HIPK2           | hipk          | CG17090    | w[1118]; P{w+mC}=GT1}hipk{B00855}/TM6B, Tb[1]                                     |
| ILK             | ilk           | CG10504    | mwh[1] ilk[1] red[1] e[4]/TM6B, Tb[1]                                             |
| INSR            | InR           | CG18402    | ry[506] P{ry[+7.2]=PZ}InR{05545}/TM6B, Tb[1]                                      |
| IRAK4           | pll           | CG5974     | e[1] pll[2] ca[1]                                                                 |
| JAK             | hop           | CG1594     | hop[2]/FM7c, P{w+mC}=2xTb[1]-RFP}FM7c, sn[+]                                      |
| JNK             | bsk           | CG5680     | bsk[1] cn[1] bw[1] sp[1]/CyO, P{w+mC}=2xTb[1]-RFP}CyO                             |

## Supplementary Table 1: Kinase-mutated flies.

Gene names, corresponding CG numbers, and fly genotypes are shown for each kinase. Human orthologs of fly genes were predicted by DIOPT ([http://www.flyrnai.org/cgi-bin/DRSC\\_orthologs.pl](http://www.flyrnai.org/cgi-bin/DRSC_orthologs.pl)).

| Human gene name | Fly gene name | Fly geneID | Fly genotype                                                                                                |
|-----------------|---------------|------------|-------------------------------------------------------------------------------------------------------------|
| KDR             | Cad96Ca       | CG10244    | w[1118]; P[w+mC]=XP;Cad96Ca[d07355]/TM6B, Tb[1]                                                             |
| KSR             | ksr           | CG2899     | y[1] w[67c23]; P[w+mC] y[+mDint2]=EPgy2 ksr[EY01688] Hcs[EY01688]/TM6B, Tb[1]                               |
| LATS1           | wts           | CG12072    | w[*]; wts[x1] P[ry[+7.2]=neoFRT]82B/TM6B, Tb[1]                                                             |
| LIMK1           | LIMK1         | CG1848     | y[1] w[67c23] P[w+mC] y[+mDint2]=EPgy2 LIMK1[EY08757]                                                       |
| LKB1            | Lkb1          | CG9374     | w[1118]; P[w+mC]=EP Lkb1[G5285]                                                                             |
| LRKK1           | Lrrk          | CG5483     | w[*]; Lrrk[ex1]/TM6B, Tb[1]                                                                                 |
| MAP2K4          | Mkk4          | CG9738     | w[1118]; PBac[w+mC]=RB Mkk4[e01485]/TM6B, Tb[1]                                                             |
| MAP2K6          | lic           | CG12244    | y[1] w[67c23] P[y[+m8]=Mae-UAS.6.11]ic[CG01785]/FM7c, P[w+mC]=2xTb[1]-RFP FM7c, sn[+]                       |
| MAP2K7          | hep           | CG4353     | w[*] hep[r75]/FM7c, P[w+mC]=2xTb[1]-RFP FM7c, sn[+]                                                         |
| MAP3K13         | wnd           | CG8789     | y[1] w[*]; Mi[PT-BM.2]wnd[Mi00494-BM.2]/TM6B, Tb[1]                                                         |
| MAP3K15         | Pk92B         | CG4720     | y[1] w[*]; Mi[y[+mDint2]=MIC]Pk92B[Mi02915]/TM6B, Tb[1]                                                     |
| MAP3K4          | Mekk1         | CG7717     | y[1] w[67c23]; P[w+mC] y[+mDint2]=EPgy2 Mekk1[EY11461]                                                      |
| MAP3K7          | Tak1          | CG18492    | w[*] Tak1[179]                                                                                              |
| MAP3K7          | Tak1          | CG31421    | w[1118]; PBac[w+mC]=PB Syp[c04375] Tak1[c04375]/TM6B, Tb[1]                                                 |
| MAP3K7          | Tak2          | CG4803     | w[1118]; P[w+mC]=XP Tak2[d10454]                                                                            |
| MAP3K9          | slpr          | CG2272     | w[1118] Mi[ET1]slpr[MB03655]                                                                                |
| MAP4K3          | hppy          | CG7097     | w[*]; P[w+mW.hs]=FRT(w[hs]) G13 P[w+mC]=lacW hppy[SH1261]/CyO, P[w+mC]=2xTb[1]-RFP CyO                      |
| MAP4K4          | msn           | CG16973    | w[*]; msn[102] P[ry[+7.2]=neoFRT]80B/TM6B                                                                   |
| MAPK1           | rl            | CG12559    | y[1] w[*]; Mi[y[+mDint2]=MIC]rl[Mi07033]/CyO, P[w+mC]=2xTb[1]-RFP CyO                                       |
| MAPK11          | p38c          | CG33338    | y[1] w[67c23]; ry[506] P[y[+mDint2] w[BR.E.BR]=SUPor-P]p38c[KG05834]/TM6B, Tb[1]                            |
| MAPK14          | Mpk2          | CG5475     | w[*]; P[ry[+7.2]=neoFRT]82B Mpk2[1]                                                                         |
| MAPK14          | p38b          | CG7393     | y[1] w[67c23]; P[w+mC] y[+mDint2]=EPgy2 p38b[EY11174]                                                       |
| MAPK15          | Erk7          | CG32703    | y[1] w[*] Mi[y[+mDint2]=MIC]Erk7[Mi05843]                                                                   |
| MAPKAPK3        | MAPK-Ak2      | CG3086     | w[*] P[w+mC]=EP MAPK-Ak2[G265]                                                                              |
| MARK3           | par-1         | CG8201     | y[1] w[67c23]; P[w+mC]=lacW par-1[k06323]/CyO, P[w+mC]=2xTb[1]-RFP CyO                                      |
| MAST1           | CG6498        | CG6498     | w[1118]; Mi[ET1]CG6498[MB04862]                                                                             |
| MASTL           | gwI           | CG7719     | w[1118]; P[w+mC]=EP gwI[EP515]/TM6B, Tb[1]                                                                  |
| MEK             | Dsor1         | CG15793    | y[1] w[*] Dsor1[LH110] P[w+mW.hs]=FRT(w[hs]) 101/FM7c, P[w+mC]=2xTb[1]-RFP FM7c, sn[+]                      |
| MKNK1           | Lk6           | CG17342    | w[1118]; Lk6[2]/TM6B, Tb[1]                                                                                 |
| MST4            | GckIII        | CG5169     | y[1] w[67c23]; P[w+mC] y[+mDint2]=EPgy2 GckIII[EY05076]                                                     |
| MTOR            | Tor           | CG5092     | y[1] w[*]; Tor[DeltaP] P[ry[+7.2]=neoFRT]40A/CyO, P[w+mC]=2xTb[1]-RFP CyO                                   |
| MUSK            | Nrk           | CG4007     | y[1] w[*]; P[w+mC]=EP Nrk[G2759] CG34439[G2759]                                                             |
| MYLK2           | Strm-Mlck     | CG44162    | w[1118]; PBac[w+mC]=PB Strm-Mlck[c02860]/CyO, P[w+mC]=2xTb[1]-RFP CyO                                       |
| MYLK3           | sqa           | CG42347    | w[1118]; PBac[w+mC]=WH sqa[f01512]/CyO, P[w+mC]=2xTb[1]-RFP CyO                                             |
| MYO3A           | ninaC         | CG5125     | w[*]; ninaC[5]                                                                                              |
| NCK1            | dock          | CG3727     | P[ry[+7.2]=PZ]dock[04723] cn[1]/CyO, P[w+mC]=2xTb[1]-RFP CyO                                                |
| NEK11           | png           | CG11420    | y[1] png[1058] w[*]/FM7c, P[w+mC]=2xTb[1]-RFP FM7c, sn[+]                                                   |
| NIM1            | CG4629        | CG4629     | y[1] w[*]; Mi[y[+mDint2]=MIC]CG4629[Mi02585]                                                                |
| NLK             | nmo           | CG7892     | w[*]; nmo[DB] P[ry[+7.2]=neoFRT]80B/TM6B, Tb[1]                                                             |
| NPR1            | CG3216        | CG3216     | w[1118]; Mi[ET1]CG3216[MB07455]                                                                             |
| NPR1            | Gyc76C        | CG42636    | y[1] w[1118]; PBac[w+mC]=5HPw[+]Gyc76C[A377]                                                                |
| NPR2            | CG31183       | CG31183    | y[1] w[*]; Mi[y[+mDint2]=MIC]CG31183[Mi02001]                                                               |
| NPR2            | Gyc32E        | CG33114    | y[1] w[67c23]; P[y[+mDint2] w[BR.E.BR]=SUPor-P]Gyc32E[KG06014]                                              |
| NRBP1           | Madm          | CG1098     | w[1118]; P[w+mC]=EP Madm[EP3137]/TM6B, Tb[1]                                                                |
| NUAK1           | CG43143       | CG43143    | y[1] w[*]; Mi[y[+mDint2]=MIC]CG43143[Mi04137]/TM6B, Tb[1]                                                   |
| PAK1            | Pak           | CG10295    | Pak[6]/TM6B, Tb[1]                                                                                          |
| PAK3            | Pak3          | CG14895    | y[1] w[*]; P[y[+m8]=Mae-UAS.6.11]Pak3[LA00012]                                                              |
| PAK7            | mbt           | CG18582    | y[1] w[67c23] P[w+mC] y[+mDint2]=EPgy2 mbt[EY08341]                                                         |
| PASK            | Pask          | CG3105     | y[1] w[*]; Mi[y[+mDint2]=MIC]Pask[Mi04252]                                                                  |
| PDK3            | Pdk           | CG8808     | y[1] w[67c23]; P[w+mC] y[+mDint2]=EPgy2 Pdk[EY01879]/CyO, P[w+mC]=2xTb[1]-RFP CyO                           |
| PDPK1           | Pdk1          | CG1210     | w[1118]; P[w+mGT]=GT1 Pdk1[BG02759]                                                                         |
| PIK3C2A         | PI3K68D       | CG11621    | w[1118]; Mi[ET1]PI3K68D[MB08286] CG14131[MB08286]                                                           |
| PIK3CA          | PI3K92E       | CG4141     | w[1118]; Mi[ET1]PI3K92E[MB06212]/TM6B, Tb[1]                                                                |
| PIK3R4          | ird1          | CG9746     | y[1] w[*]; Mi[y[+mDint2]=MIC]ird1[Mi05805]/TM6B, Tb[1]                                                      |
| PINK1           | Pink1         | CG4523     | w[*] Pink1[B9]/FM7c, P[w+mC]=2xTb[1]-RFP FM7c, sn[+]                                                        |
| PITPNM2         | rdgB          | CG11111    | y[1] w[67c23] P[w+mC] y[+mDint2]=EPgy2 rdgB[EY20869] CG32625[EY20869]/FM7c, P[w+mC]=2xTb[1]-RFP FM7c, sn[+] |
| PKN2            | Pkn           | CG2049     | P[ry[+7.2]=PZ]Pkn[06736] cn[1]/CyO, P[w+mC]=2xTb[1]-RFP CyO                                                 |
| PLK1            | polo          | CG12306    | w[*]; P[w+mC]=PTT-GC polo[CC01326]/TM6B, Tb[1]                                                              |
| PLK4            | SAK           | CG7186     | w[1118]; PBac[w+mC]=PB SAK[c06612]/TM6B, Tb[1]                                                              |
| PRKAA2          | SNF1A         | CG3051     | SNF1A[1]/FM7c, P[w+mC]=2xTb[1]-RFP FM7c, sn[+]                                                              |
| PRKACA          | Pka-C1        | CG4379     | Pka-C1[H2]/CyO, P[w+mC]=2xTb[1]-RFP CyO                                                                     |
| PRKACG          | CG12069       | CG12069    | w[1118]; Mi[ET1]CG12069[MB10013]/TM6B, Tb[1]                                                                |
| PRKAR2A         | Pka-R2        | CG15862    | y[1] w[*]; Mi[y[+mDint2]=MIC]Pka-R2[Mi00092]/CyO, P[w+mC]=2xTb[1]-RFP CyO                                   |
| PRKCA           | inaC          | CG6518     | w[*]; inaC[2]                                                                                               |
| PRKCA           | Pkc53E        | CG6622     | y[1] w[67c23]; P[w+mC] y[+mDint2]=EPgy2 Pkc53E[EY14093]                                                     |
| PRKCD           | Pkcdelta      | CG42349    | w[1118] PBac[w+mC]=RB Pkcdelta[e04408]                                                                      |

Supplementary Table 1, continued.

| Human gene name | Fly gene name | Fly geneID | Fly genotype                                                                                                                              |
|-----------------|---------------|------------|-------------------------------------------------------------------------------------------------------------------------------------------|
| PRKCE           | Pkc38E        | CG1954     | w[1118]; PBac(w[+mC]=WH)Pkc98E[06221]/TM6B, Tb[1]                                                                                         |
| PRKCI           | aPKC          | CG42783    | y[1] w[67c23]; P(w[+mC]=lacW)jaPKC[k06403]/CyO, P(w[+mC]=2xTb[1]-RFP)CyO                                                                  |
| PRKD1           | PKD           | CG7125     | y[1] w[67c23]; Mi(ET1)PKD[MB00674]                                                                                                        |
| PRKG1           | CG4839        | CG4839     | y[1] w[*]; Mi(y[+mDint2]=MIC)CG4839[MI08552]/CyO, P(w[+mC]=2xTb[1]-RFP)CyO                                                                |
| PRKG1           | for           | CG10033    | y[1] w[*]; P(w[+mC]=UASp-YFP.RabX2.S21N)for[02]/CyO, P(w[+mC]=2xTb[1]-RFP)CyO                                                             |
| PRKG2           | Pkg21D        | CG3324     | w[1118]; Mi(ET1)Pkg21D[MB04805]                                                                                                           |
| PRKX            | Pka-C3        | CG6117     | y[1] w[*]; Mi(y[+mDint2]=MIC)Pka-C3[MI04599]/TM6B, Tb[1]                                                                                  |
| PRPF4B          | CG7028        | CG7028     | y[1] w[67c23]; P(w[+mC] y[+mDint2]=EPgy2)CG7028[EY1156]                                                                                   |
| PTK2            | Fak           | CG10023    | y[1] w[67c23]; P(y[+mDint2] w[BR.E.BR]=SUPor-P)Fak[KG00304]                                                                               |
| PTK7            | otk           | CG8967     | w[1118]; P(w[+mC]=EP)otk[EP2017]/CyO, P(w[+mC]=2xTb[1]-RFP)CyO                                                                            |
| PXK             | CG8726        | CG8726     | y[1] w[67c23]; P(w[+mC] y[+mDint2]=EPgy2)CG8726[EY21837]                                                                                  |
| PXK             | Slob          | CG43756    | w[*]; PBac(GAL4D.EYFP)Slob[PL00361] Myo28B1[PL00361] cn[1] bw[1]; PBac(GAL4D.EYFP)PL00361 P(w[+mW.hs]=FRT(w[hs]))2A P(ry[+7.2]=neoFRT)82B |
| RET             | Ret           | CG14396    | y[1] w[*]; Mi(y[+mDint2]=MIC)Ret[MI07200]/CyO, P(w[+mC]=2xTb[1]-RFP)CyO                                                                   |
| RIOK3           | CG3008        | CG3008     | y[1] w[1118]; P(w[+mC]=EP)CG3008[G18059]                                                                                                  |
| ROCK1           | rok           | CG9774     | y[1] w[1118] rok[2] P(ry[+7.2]=neoFRT)19A/FM7c, P(w[+mC]=2xTb[1]-RFP)FM7c, sn[+]                                                          |
| ROS1            | sev           | CG18085    | w[1118] sev[14]; P(w[+mW.hs]=sev2)ch21                                                                                                    |
| RPS6KA3         | S6kII         | CG17596    | w[*] P(w[+mC]=EP)S6kII[G1845] CG17600[G1845]                                                                                              |
| RPS6KA5         | JIL-1         | CG6297     | y[1]; P(y[+mDint2] w[BR.E.BR]=SUPor-P)JIL-1[KG02848] ry[506]/TM6B, Tb[1]                                                                  |
| RPS6KB1         | S6k           | CG10539    | P(ry[+7.2]=PZ)S6k[07084] ry[506]/TM6B, Tb[1]                                                                                              |
| RYK             | dnt           | CG17559    | y[1] w[67c23]; P(y[+7.7] w[+mC]=wHy)dnt[DG04604]/CyO, P(w[+mC]=2xTb[1]-RFP)CyO                                                            |
| RYK             | drl           | CG17348    | w[1118]; drl[exc21]/CyO, P(w[+mC]=2xTb[1]-RFP)CyO                                                                                         |
| RYK             | Drl-2         | CG3915     | w[1118]; P(w[+mGT]=GT1)Drl-2[BG02105]                                                                                                     |
| SBK1            | CG11221       | CG11221    | y[1] w[*]; Mi(y[+mDint2]=MIC)CG11221[MI03008]/CyO, P(w[+mC]=2xTb[1]-RFP)CyO                                                               |
| SBK2            | CG4945        | CG4945     | w[1118]; PBac(w[+mC]=WH)CG4945[02115]                                                                                                     |
| SCYL1           | yata          | CG1973     | y[1] w[67c23]; P(y[+7.7] w[+mC]=wHy)yata[DG08312]/TM6B, Tb[1]                                                                             |
| SCYL2           | CG1951        | CG1951     | y[1] w[67c23]; P(w[+mC] y[+mDint2]=EPgy2)CG1951[EY00129]                                                                                  |
| SCYL2           | CG34356       | CG34356    | y[1] w[*]; Mi(y[+mDint2]=MIC)CG34356[MI08649]/TM6B, Tb[1]                                                                                 |
| SCYL3           | CG1344        | CG1344     | w[1118]; P(w[+mC]=EP)CG1344[EP2646]/CyO, P(w[+mC]=2xTb[1]-RFP)CyO                                                                         |
| SGK494          | Pk17E         | CG7001     | y[1] w[67c23] P(w[+mC] y[+mDint2]=EPgy2)Pk17E[EY06723]                                                                                    |
| SIK2            | SiK2          | CG4290     | P(w[+mC]=EP)SiK2[G366] w[*]                                                                                                               |
| SIK3            | SiK3          | CG42856    | y[1] w[67c23]; P(w[+mC] y[+mDint2]=EPgy2)SiK3[EY14354]/CyO, P(w[+mC]=2xTb[1]-RFP)CyO                                                      |
| SMG1            | nonC          | CG32743    | w[*] P(w[+mC]=EP)nonC[G1076]                                                                                                              |
| SPEG            | Unc-89        | CG33519    | y[1] w[67c23]; P(w[+mC] y[+mDint2]=EPgy2)Unc-89[EY15484]                                                                                  |
| SPHK1           | Sk2           | CG32484    | y[1] w[67c23]; P(y[+mDint2] w[BR.E.BR]=SUPor-P)Sk2[KG05894] ry[506]                                                                       |
| SRPK2           | SRPK          | CG8174     | y[1] w[67c23]; P(w[+mC] y[+mDint2]=EPgy2)SRPK[EY03876]                                                                                    |
| SRPK3           | srpk79D       | CG11489    | w[1118]; PBac(w[+mC]=PB)srpk79D[c00270]                                                                                                   |
| STK10           | slik          | CG4527     | y[1]; P(y[+mDint2] w[BR.E.BR]=SUPor-P)slik[KG04837]                                                                                       |
| STK17A          | Drak          | CG32666    | y[1] P(y[+mDint2] w[BR.E.BR]=SUPor-P)Drak[KG03058]/FM7c, P(w[+mC]=2xTb[1]-RFP)FM7c, sn[+]                                                 |
| STK3            | hpo           | CG11228    | y[d2] w[1118] P(ry[+7.2]=ey-FLP.N)2; P(ry[+7.2]=neoFRT)42D hpo[KC202]/CyO, P(w[+mC]=GAL4-Kr.C)DC3, P(w[+mC]=UAS-GFP.S65T)DC7              |
| STK32B          | CG32944       | CG32944    | w[*]; P(w[+mW.hs]=FRT(w[hs]))2A PBac(GAL4D.EYFP)CG32944[PL00206] P(ry[+7.2]=neoFRT)82B                                                    |
| STK36           | fu            | CG6551     | fu[mH63]/FM7c, P(w[+mC]=2xTb[1]-RFP)FM7c, sn[+]                                                                                           |
| STK38           | trc           | CG8637     | ru[1] jv[1] trc[1] ca[1]/TM6B, Tb[1]                                                                                                      |
| STK39           | fray          | CG7693     | y[1] w[*]; Mi(y[+mDint2]=MIC)fray[MI03454] CG7694[MI03454]/TM6B, Tb[1]                                                                    |
| STYK1           | CG3277        | CG3277     | y[1] w[*]; Mi(y[+mDint2]=MIC)CG3277[MI06697]                                                                                              |
| SYK             | shark         | CG18247    | P(ry[+7.2]=neoFRT)43D shark[1]/CyO, P(w[+mC]=2xTb[1]-RFP)CyO                                                                              |
| TAF1            | Taf1          | CG17603    | w[1118]; P(w[+mC]=EP)Taf1[EP421]/TM6B, Tb[1]                                                                                              |
| TAOK1           | Tao           | CG14217    | w[1118] P(w[+mC]=EP)Tao[EP1455]                                                                                                           |
| TBK1            | ik2           | CG2615     | y[1] w[*]; ik2[5] dp[ov1] bw[1]/CyO, P(w[+mC]=2xTb[1]-RFP)CyO                                                                             |
| TEC             | Btk29A        | CG8049     | y[1] w[67c23]; P(w[+mC]=lacW)Btk29A[k00206]/CyO, P(w[+mC]=2xTb[1]-RFP)CyO                                                                 |
| TESK2           | cdi           | CG6027     | ry[506] cdi[R47]/TM6B, Tb[1]                                                                                                              |
| TGFBR1          | babo          | CG8224     | w[*]; babo[32]/CyO, P(w[+mC]=2xTb[1]-RFP)CyO                                                                                              |
| TIE1            | Tie           | CG7525     | y[1] w[*]; Mi(y[+mDint2]=MIC)Tie[MI02904]/TM6B, Tb[1]                                                                                     |
| TIE1            | tor           | CG1389     | vas[1] tor[1] cn[1] bw[1] sp[1]/CyO, P(w[+mC]=2xTb[1]-RFP)CyO                                                                             |
| TLK2            | tlk           | CG34412    | y[1] w[67c23] P(w[+mC] y[+mDint2]=EPgy2)Tlk[EY14954]/FM7c, P(w[+mC]=2xTb[1]-RFP)FM7c, sn[+]                                               |
| TNK1            | Ack-like      | CG43741    | w[1118]; Mi(ET1)Ack-like[MB05119]                                                                                                         |
| TNK2            | Ack           | CG14992    | y[1] w[67c23]; P(w[+mC] y[+mDint2]=EPgy2)Ack[EY09374]                                                                                     |
| TRIB2           | trbl          | CG5408     | y[1]; P(y[+mDint2] w[BR.E.BR]=SUPor-P)trbl[KG02308] ry[506]/TM6B, Tb[1]                                                                   |
| TRRAP           | Nipped-A      | CG33554    | Nipped-A[NC186] cn[1] bw[1]/CyO, P(w[+mC]=2xTb[1]-RFP)CyO                                                                                 |
| TSSK1B          | CG14305       | CG14305    | w[1118]; P(w[+mC]=EPg)CG14305[HP30350] CG14304[HP30350]                                                                                   |
| TTBK1           | Asator        | CG11533    | y[1] w[67c23]; ry[506]; P(y[+mDint2] w[BR.E.BR]=SUPor-P)Asator[KG05051]                                                                   |
| TTK             | ald           | CG7643     | w[*]; P(w[+mGS]=GSV1)ald[EP-M50.2]/TM6B, Tb[1]                                                                                            |
| TTN             | bt            | CG32019    | w[1118]; bt[b-b]ln[4]ci[D], ci[D] pan[ciD]                                                                                                |
| ULK1            | Atg1          | CG10967    | w[1118]; P(ry[+7.2]=PZ)Atg1[00305] ry[506]/TM6B, Tb[1]                                                                                    |
| ULK3            | CG8866        | CG8866     | y[1] w[67c23]; P(w[+mC] y[+mDint2]=EPgy2)CG8866[EY18321]/TM6B, Tb[1]                                                                      |
| VRK3            | CG8878        | CG8878     | y[1] w[67c23]; P(w[+mC] y[+mDint2]=EPgy2)CG8878[EY10775] Hen1[EY10775]                                                                    |
| WEE1            | wee           | CG4488     | w[1]; wee[ES1] cn[1]/CyO, P(w[+mC]=2xTb[1]-RFP)CyO                                                                                        |
| WNK1            | Wnk           | CG7177     | y[1] w[67c23]; P(w[+mC] y[+mDint2]=EPgy2)Wnk[EY10165]/TM6B, Tb[1]                                                                         |

Supplementary Table 1, continued.

| Chromosome X                                     |       |     |                |                  |                                                 |       |     |      |       |     |
|--------------------------------------------------|-------|-----|----------------|------------------|-------------------------------------------------|-------|-----|------|-------|-----|
| Drugs                                            |       |     | Gene symbol    |                  | <i>ptc&gt;Ret<sup>M955T</sup></i> viability (%) |       |     | s.e. |       |     |
| -                                                | soraf | L15 | Human          | Fly              | -                                               | soraf | L15 | -    | soraf | L15 |
|                                                  |       |     |                | control          | 3                                               | 18    | 20  | 1    | 1     | 4   |
| <i>Pro-target for sorafenib</i>                  |       |     |                |                  |                                                 |       |     |      |       |     |
| *                                                | M     |     | SGK494         | <i>Pk17E</i>     | 19                                              | 67    | 43  | 4    | 5     | 18  |
| <i>Pro-targets for LS1-15</i>                    |       |     |                |                  |                                                 |       |     |      |       |     |
| *                                                | M     |     | GSK3           | <i>sgg</i>       | 13                                              | 29    | 69  | 2    | 14    | 13  |
| *                                                | M     |     | NEK11          | <i>png</i>       | 26                                              | 35    | 63  | 8    | 4     | 7   |
| *                                                | M     |     | TLK2           | <i>tlk</i>       | 35                                              | 42    | 59  | 2    | 6     | 9   |
| *                                                | M     |     | ROS1           | <i>sev</i>       | 17                                              | 30    | 54  | 4    | 8     | 8   |
| *                                                | W     |     | BRD3           | <i>fs(1)h</i>    | 31                                              | 38    | 47  | 6    | 10    | 7   |
| *                                                | W     |     | CSNK1A1 (CK1a) | <i>Cklalpha</i>  | 37                                              | 14    | 43  | 3    | 10    | 1   |
| *                                                | W     |     | PINK1          | <i>Pink1</i>     | 33                                              | 19    | 42  | 5    | 4     | 7   |
| *                                                | W     |     | DYRK1A         | <i>mnb</i>       | 2                                               | 29    | 36  | 1    | 5     | 1   |
| <i>Pro-targets for both sorafenib and LS1-15</i> |       |     |                |                  |                                                 |       |     |      |       |     |
| *                                                | S     | S   | BRAF           | <i>phl</i>       | 100                                             | 90    | 96  | 0    | 7     | 4   |
| *                                                | S     | S   | STK36 (FU)     | <i>fu</i>        | 76                                              | 93    | 88  | 9    | 7     | 13  |
| *                                                | S     | S   | PRKAA2 (AMPK)  | <i>SNF1A</i>     | 29                                              | 86    | 81  | 3    | 9     | 10  |
| *                                                | M     | M   | MEK            | <i>Dsor1</i>     | 78                                              | 55    | 80  | 6    | 3     | 20  |
| *                                                | M     | M   | JAK            | <i>hop</i>       | 45                                              | 63    | 78  | 9    | 11    | 9   |
| *                                                | W     | M   | TAOK1          | <i>Tao</i>       | 24                                              | 46    | 75  | 12   | 17    | 3   |
| *                                                | M     | M   | MAP2K6 (MKK6)  | <i>lic</i>       | 36                                              | 54    | 75  | 10   | 8     | 13  |
| *                                                | W     | M   | ROCK1          | <i>rok</i>       | 32                                              | 42    | 67  | 15   | 2     | 7   |
| *                                                | M     | M   | STK17A (DRAK1) | <i>Drak</i>      | 14                                              | 64    | 65  | 9    | 9     | 6   |
| *                                                | M     | M   | MAP2K7 (MKK7)  | <i>hep</i>       | 20                                              | 55    | 58  | 6    | 2     | 5   |
| *                                                | M     | W   | ATR            | <i>mei-41</i>    | 10                                              | 61    | 39  | 3    | 6     | 1   |
| *                                                | W     | W   | CDC7           | <i>l(1)G0148</i> | 0                                               | 24    | 21  | 0    | 4     | 1   |

### Supplementary Table 2: Pro-targets of sorafenib [1] and LS1-15 [4].

A list of genes of which heterozygosity led to statistically significant increase in the survival of *ptc>dRet<sup>M955T</sup>* flies in the presence of **1** or **4**. *ptc>dRet<sup>M955T</sup>* flies were crossed to kinase-mutant flies, and the number of *ptc>dRet<sup>M955T</sup>, mutant<sup>+/+</sup>* adults was divided by that of total pupae to calculate percent viability. Viabilities of kinase-proficient controls differ between data sets for different chromosomes due to swapped genders of parent flies in the crosses (Supplementary Figs. 3b-h). W, M, and S indicate statistically significantly weak, modest, and strong effects, respectively: for genes on the X chromosome, weak (21-50% viability), moderate (51-80% viability), and strong effects (81-100% viability), respectively, and for genes on 2nd, 3rd, and 4th chromosomes, weak (51-70% viability), moderate (71-90% viability), and strong effects (91-100% viability), respectively. s.e., standard error for three experimental replicates. Asterisks: statistically significant change in % viability in the absence of drug treatment. -, soraf, and L15 indicate vehicle-, sorafenib [1]-, and LS1-15 [4]-treated flies, respectively.

## Chromosomes 2, 3 and 4

| Drugs |       |     | Gene symbol |         | <i>ptc&gt;Ret<sup>M95T</sup></i> viability (%) |       |     | s.e. |       |     |
|-------|-------|-----|-------------|---------|------------------------------------------------|-------|-----|------|-------|-----|
| -     | soraf | L15 | Human       | Fly     | -                                              | soraf | L15 | -    | soraf | L15 |
|       |       |     |             | control | 28                                             | 48    | 52  | 3    | 5     | 9   |

## Pro-targets for sorafenib

|   |   |               |               |    |    |    |    |   |    |
|---|---|---------------|---------------|----|----|----|----|---|----|
|   | M | KSR2          | <i>ksr</i>    | 51 | 78 | 69 | 8  | 2 | 13 |
|   | M | STK24 (MST3)  | <i>GckIII</i> | 61 | 73 | 67 | 12 | 7 | 10 |
| * | M | IKBKB         | <i>ird5</i>   | 47 | 89 | 57 | 5  | 2 | 9  |
| * | M | STK39 (PASK)  | <i>fray</i>   | 54 | 71 | 52 | 3  | 8 | 6  |
|   | M | ABL1, ABL2    | <i>Abl</i>    | 18 | 79 | 42 | 6  | 3 | 6  |
|   | M | MAP3K4 (MTK1) | <i>Mekk1</i>  | 12 | 72 | 38 | 4  | 5 | 5  |

## Pro-targets for LS1-15

|   |   |                  |                 |    |    |    |    |    |    |
|---|---|------------------|-----------------|----|----|----|----|----|----|
| * | S | LATS1 (WARTS)    | <i>wts</i>      | 70 | 58 | 96 | 10 | 4  | 4  |
|   | M | KDR              | <i>Cad96Ca</i>  | 44 | 46 | 89 | 13 | 5  | 1  |
|   | M | PRKCA            | <i>Pkc53E</i>   | 55 | 51 | 87 | 11 | 5  | 2  |
|   | M | TNK1             | <i>Ack-like</i> | 42 | 55 | 87 | 6  | 4  | 2  |
| * | M | ADCK5            | <i>CG7616</i>   | 84 | 63 | 86 | 3  | 7  | 3  |
| * | M | CDK2             | <i>cdc2c</i>    | 78 | 54 | 85 | 4  | 3  | 7  |
|   | M | CSNK1G3          | <i>gish</i>     | 58 | 51 | 83 | 12 | 10 | 1  |
| * | M | CAMK1D           | <i>CaMKI</i>    | 56 | 43 | 83 | 4  | 3  | 3  |
| * | M | RYK              | <i>Drl-2</i>    | 53 | 58 | 83 | 13 | 5  | 2  |
| * | M | RPS6KA5 (MSK1)   | <i>JIL-1</i>    | 75 | 32 | 83 | 5  | 11 | 5  |
| * | M | CDK1             | <i>cdc2</i>     | 58 | 56 | 82 | 7  | 16 | 1  |
| * | M | PAK1             | <i>Pak</i>      | 65 | 30 | 81 | 3  | 5  | 2  |
| * | M | FER              | <i>Fps85D</i>   | 72 | 50 | 81 | 2  | 13 | 7  |
|   | M | NPR1             | <i>CG3216</i>   | 37 | 39 | 80 | 2  | 10 | 4  |
| * | M | SYK              | <i>shark</i>    | 63 | 48 | 80 | 13 | 7  | 10 |
|   | M | PTK7             | <i>otk</i>      | 41 | 64 | 80 | 8  | 2  | 8  |
| * | M | CDK4/6           | <i>Cdk4</i>     | 50 | 53 | 79 | 6  | 12 | 3  |
| * | M | TRIB2            | <i>trbl</i>     | 38 | 44 | 77 | 6  | 6  | 7  |
| * | M | RYK              | <i>dnt</i>      | 33 | 60 | 75 | 3  | 6  | 2  |
| * | M | LKB1             | <i>Lkb1</i>     | 61 | 61 | 74 | 8  | 7  | 2  |
| * | M | MASTL (GWL)      | <i>gwl</i>      | 61 | 38 | 74 | 7  | 5  | 8  |
| * | M | ACVR1            | <i>sax</i>      | 35 | 52 | 73 | 1  | 2  | 2  |
| * | M | VRK3             | <i>CG8878</i>   | 43 | 46 | 73 | 2  | 2  | 1  |
| * | M | CIT              | <i>sti</i>      | 58 | 43 | 72 | 9  | 8  | 4  |
| * | M | PLK4             | SAK             | 64 | 39 | 72 | 7  | 5  | 6  |
| * | M | CDK12            | <i>Cdk12</i>    | 66 | 47 | 72 | 2  | 2  | 6  |
| * | M | NLK              | <i>nmo</i>      | 69 | 45 | 71 | 3  | 0  | 7  |
|   | W | MTOR             | <i>Tor</i>      | 43 | 46 | 70 | 9  | 9  | 5  |
| * | W | CASK             | CASK            | 48 | 53 | 68 | 3  | 9  | 3  |
|   | W | PLK1             | <i>polo</i>     | 39 | 24 | 68 | 9  | 12 | 5  |
| * | W | RPS6KB1 (p70S6K) | S6k             | 61 | 39 | 66 | 9  | 7  | 1  |
|   | W | MINK1            | <i>msn</i>      | 42 | 34 | 66 | 6  | 4  | 1  |
| * | W | DDR2             | <i>Ddr</i>      | 49 | 37 | 65 | 6  | 12 | 4  |
|   | W | ATM              | <i>tefu</i>     | 29 | 61 | 62 | 4  | 2  | 1  |

## Supplementary Table 2, continued.

## Chromosomes 2, 3 and 4 (continued)

| Drugs |       |     | Gene symbol |         | <i>ptc&gt;Ret</i> <sup>M955T</sup> viability (%) |       |     | s.e. |       |     |
|-------|-------|-----|-------------|---------|--------------------------------------------------|-------|-----|------|-------|-----|
| -     | soraf | L15 | Human       | Fly     | -                                                | soraf | L15 | -    | soraf | L15 |
|       |       |     |             | control | 28                                               | 48    | 52  | 3    | 5     | 9   |

*Pro-targets for both sorafenib and LS1-15*

|   |   |   |                       |                |    |    |     |    |    |    |
|---|---|---|-----------------------|----------------|----|----|-----|----|----|----|
| * | S | S | <i>TGFBR1 (ALK5)</i>  | <i>babo</i>    | 98 | 96 | 100 | 2  | 2  | 0  |
| * | M | S | <i>LRRK1</i>          | <i>Lrrk</i>    | 94 | 87 | 98  | 2  | 3  | 1  |
| * | M | S | <i>MAP4K3 (GLK)</i>   | <i>hppy</i>    | 95 | 89 | 97  | 1  | 5  | 1  |
| * | M | S | <i>MUSK</i>           | <i>Nrk</i>     | 77 | 79 | 95  | 5  | 5  | 3  |
| * | W | S | <i>DYRK4</i>          | <i>smi35A</i>  | 64 | 70 | 95  | 10 | 8  | 3  |
| * | S | S | <i>PKN</i>            | <i>Pkn</i>     | 88 | 93 | 94  | 2  | 2  | 3  |
| * | M | S | <i>SRPK</i>           | <i>SRPK</i>    | 77 | 89 | 94  | 7  | 11 | 4  |
| * | M | S | <i>PRKD1</i>          | <i>PKD</i>     | 83 | 84 | 94  | 4  | 3  | 1  |
|   | M | S | <i>PRKG1</i>          | <i>CG4839</i>  | 60 | 74 | 93  | 14 | 2  | 2  |
| * | M | S | <i>TNK2</i>           | <i>Ack</i>     | 70 | 71 | 93  | 1  | 6  | 4  |
| * | M | S | <i>ILK</i>            | <i>Ilk</i>     | 85 | 78 | 93  | 1  | 5  | 6  |
|   | M | S | <i>CDC42BPA</i>       | <i>gek</i>     | 47 | 81 | 92  | 8  | 2  | 1  |
| * | W | S | <i>CHEK1</i>          | <i>grp</i>     | 78 | 67 | 92  | 5  | 4  | 3  |
|   | M | S | <i>MAP3K13 (LZK)</i>  | <i>wnd</i>     | 33 | 82 | 92  | 5  | 5  | 4  |
| * | M | S | <i>SRPK</i>           | <i>srpk79D</i> | 88 | 87 | 92  | 6  | 4  | 4  |
| * | M | S | <i>FRK</i>            | <i>Src42A</i>  | 88 | 80 | 91  | 6  | 9  | 5  |
| * | M | S | <i>JNK</i>            | <i>bsk</i>     | 76 | 88 | 91  | 6  | 3  | 5  |
| * | M | S | <i>EPH</i>            | <i>Eph</i>     | 72 | 64 | 91  | 2  | 4  | 3  |
| * | W | S | <i>AKT1</i>           | <i>Akt1</i>    | 51 | 69 | 91  | 7  | 3  | 2  |
| * | M | M | <i>PRKACA (PKA)</i>   | <i>Pka-C1</i>  | 56 | 71 | 90  | 4  | 4  | 7  |
| * | M | M | <i>TTN</i>            | <i>bt</i>      | 78 | 82 | 90  | 6  | 4  | 4  |
| * | M | M | <i>BUB1</i>           | <i>Bub1</i>    | 45 | 80 | 90  | 4  | 13 | 2  |
| * | W | M | <i>SPHK2 (SK2)</i>    | <i>Sk2</i>     | 67 | 68 | 89  | 1  | 8  | 7  |
| * | M | M | <i>CSNK1E</i>         | <i>dco</i>     | 90 | 72 | 89  | 8  | 8  | 6  |
| * | M | M | <i>CDK9</i>           | <i>Cdk9</i>    | 48 | 81 | 89  | 4  | 8  | 2  |
| * | W | M | <i>RET</i>            | <i>Ret</i>     | 73 | 69 | 88  | 3  | 4  | 6  |
| * | M | M | <i>FLT1</i>           | <i>Pvr</i>     | 69 | 71 | 88  | 4  | 9  | 2  |
| * | M | M | <i>EGFR</i>           | <i>Egfr</i>    | 86 | 76 | 88  | 1  | 4  | 1  |
| * | M | M | <i>NPR2</i>           | <i>Gyc32E</i>  | 61 | 76 | 87  | 8  | 4  | 4  |
| * | W | M | <i>SIK3</i>           | <i>Sik3</i>    | 43 | 67 | 86  | 3  | 4  | 4  |
| * | M | M | <i>STK3 (MST2)</i>    | <i>hpo</i>     | 66 | 76 | 86  | 3  | 8  | 6  |
|   | M | M | <i>SCYL2</i>          | <i>CG1951</i>  | 31 | 71 | 86  | 8  | 14 | 1  |
| * | M | M | <i>SCYL3</i>          | <i>CG1344</i>  | 67 | 73 | 86  | 7  | 9  | 2  |
| * | W | M | <i>PRPF4B</i>         | <i>CG7028</i>  | 57 | 65 | 86  | 4  | 5  | 2  |
| * | M | M | <i>STK32B (YANK2)</i> | <i>CG32944</i> | 60 | 80 | 86  | 4  | 6  | 2  |
| * | W | M | <i>NUAK1</i>          | <i>CG43143</i> | 62 | 69 | 84  | 4  | 7  | 6  |
| * | W | M | <i>TESK2</i>          | <i>cdi</i>     | 82 | 66 | 83  | 6  | 12 | 12 |

## Supplementary Table 2, continued.



## Chromosomes 2, 3 and 4 (continued)

|   | Drugs |       |     | Gene symbol   | Fly              | <i>ptc&gt;Ret<sup>M955T</sup></i> viability (%) |       |     | s.e. |       |     |
|---|-------|-------|-----|---------------|------------------|-------------------------------------------------|-------|-----|------|-------|-----|
|   | -     | soraf | L15 |               |                  | -                                               | soraf | L15 | -    | soraf | L15 |
|   |       |       |     | Human         | control          | 28                                              | 48    | 52  | 3    | 5     | 9   |
| * | M     | M     |     | CDK8          | <i>Cdk8</i>      | 84                                              | 78    | 83  | 4    | 5     | 4   |
|   | W     | M     |     | RIOK3         | <i>CG3008</i>    | 49                                              | 69    | 83  | 9    | 2     | 3   |
| * | M     | M     |     | MYLK          | <i>Strn-Mlck</i> | 61                                              | 85    | 83  | 2    | 4     | 2   |
|   | M     | M     |     | PDK3          | <i>Pdk</i>       | 16                                              | 71    | 83  | 4    | 16    | 6   |
| * | M     | M     |     | PRKG1         | <i>for</i>       | 55                                              | 73    | 82  | 4    | 14    | 2   |
|   | M     | M     |     | PRKG2         | <i>Pkg21D</i>    | 41                                              | 73    | 82  | 7    | 3     | 4   |
| * | S     | M     |     | CSNK2A1       | <i>Ckl1alpha</i> | 69                                              | 93    | 82  | 4    | 7     | 7   |
| * | S     | M     |     | MAPK11 (p38b) | <i>p38c</i>      | 63                                              | 93    | 81  | 6    | 7     | 3   |
| * | M     | M     |     | SPEG          | <i>Unc-89</i>    | 68                                              | 78    | 81  | 1    | 9     | 10  |
| * | M     | M     |     | STK10 (LOK)   | <i>slik</i>      | 68                                              | 83    | 81  | 3    | 4     | 1   |
| * | M     | M     |     | CAMK2D        | <i>CaMKII</i>    | 72                                              | 78    | 81  | 6    | 9     | 8   |
| * | M     | M     |     | BMPR2         | <i>wit</i>       | 78                                              | 74    | 81  | 1    | 2     | 1   |
| * | M     | M     |     | PTK2 (FAK)    | <i>Fak</i>       | 58                                              | 81    | 80  | 2    | 3     | 7   |
| * | M     | M     |     | CDK14         | <i>Eip63E</i>    | 72                                              | 73    | 80  | 6    | 6     | 6   |
| * | W     | M     |     | MARK3         | <i>par-1</i>     | 67                                              | 70    | 79  | 6    | 7     | 10  |
|   | M     | M     |     | WEE1          | <i>wee</i>       | 18                                              | 78    | 78  | 5    | 9     | 4   |
| * | M     | M     |     | PIK3CA        | <i>Pi3K92E</i>   | 59                                              | 72    | 78  | 5    | 7     | 3   |
| * | W     | M     |     | PIK3C2A       | <i>Pi3K68D</i>   | 49                                              | 63    | 78  | 8    | 10    | 6   |
| * | M     | M     |     | TRRAP         | <i>Nipped-A</i>  | 66                                              | 82    | 78  | 12   | 2     | 4   |
| * | M     | M     |     | MAP2K4 (MKK4) | <i>Mkk4</i>      | 56                                              | 75    | 78  | 4    | 6     | 12  |
| * | W     | M     |     | ULK1 (ATG1)   | <i>Atg1</i>      | 79                                              | 61    | 78  | 8    | 1     | 1   |
| * | W     | M     |     | MAPK14 (p38a) | <i>Mpk2</i>      | 82                                              | 51    | 78  | 1    | 1     | 2   |
|   | W     | M     |     | MAPK11 (p38b) | <i>p38b</i>      | 39                                              | 69    | 77  | 4    | 3     | 6   |
| * | W     | M     |     | SCYL1         | <i>yata</i>      | 91                                              | 70    | 77  | 7    | 13    | 4   |
|   | W     | M     |     | CDC7          | <i>CG5790</i>    | 31                                              | 61    | 76  | 9    | 13    | 3   |
| * | W     | M     |     | GRK5          | <i>Gprk2</i>     | 64                                              | 70    | 73  | 5    | 2     | 5   |
| * | W     | M     |     | TTBK1 (BDTK)  | <i>Asator</i>    | 60                                              | 67    | 72  | 9    | 7     | 4   |
| * | M     | M     |     | MYLK2         | <i>sqd</i>       | 47                                              | 77    | 72  | 5    | 6     | 4   |
|   | W     | M     |     | NPR1          | <i>CG10738</i>   | 45                                              | 64    | 71  | 5    | 6     | 2   |
| * | M     | W     |     | MAPK1 (ERK)   | <i>rl</i>        | 53                                              | 71    | 69  | 4    | 5     | 10  |
|   | M     | W     |     | PRKCI         | <i>aPKC</i>      | 35                                              | 78    | 68  | 7    | 2     | 1   |
|   | M     | W     |     | NIM1          | <i>CG4629</i>    | 29                                              | 79    | 68  | 2    | 2     | 10  |
| * | M     | W     |     | SRC, LCK, HCK | <i>Src64B</i>    | 70                                              | 74    | 67  | 2    | 3     | 2   |
|   | M     | W     |     | SBK2          | <i>CG4945</i>    | 25                                              | 76    | 67  | 9    | 1     | 0   |
| * | M     | W     |     | GAK           | <i>aux</i>       | 56                                              | 71    | 67  | 3    | 5     | 7   |
|   | M     | W     |     | AAK1          | <i>Nak</i>       | 42                                              | 77    | 66  | 5    | 7     | 5   |
| * | W     | W     |     | PRKX          | <i>Pka-C3</i>    | 49                                              | 70    | 66  | 5    | 3     | 4   |
| * | M     | W     |     | BTK           | <i>Btk29A</i>    | 60                                              | 81    | 63  | 2    | 4     | 4   |
|   | M     | W     |     | SBK1          | <i>CG11221</i>   | 31                                              | 86    | 56  | 5    | 7     | 6   |

Supplementary Table 2, continued.

| Chromosome X                                      |       |     |             |                  |                                                 |       |     |      |       |     |
|---------------------------------------------------|-------|-----|-------------|------------------|-------------------------------------------------|-------|-----|------|-------|-----|
| Drugs                                             |       |     | Gene symbol |                  | <i>ptc&gt;Ret<sup>M955T</sup></i> viability (%) |       |     | s.e. |       |     |
| –                                                 | soraf | L15 | Human       | Fly              | –                                               | soraf | L15 | –    | soraf | L15 |
|                                                   |       |     |             | control          | 3                                               | 18    | 20  | 1    | 1     | 4   |
| <i>Anti-targets for LS1-15</i>                    |       |     |             |                  |                                                 |       |     |      |       |     |
|                                                   |       | S   | SMG1        | <i>nonC</i>      | 3                                               | 31    | 2   | 3    | 10    | 2   |
|                                                   |       | M   | LIMK1       | <i>LIMK1</i>     | 1                                               | 22    | 8   | 1    | 9     | 4   |
| <i>Anti-targets for both sorafenib and LS1-15</i> |       |     |             |                  |                                                 |       |     |      |       |     |
| *                                                 |       | S   | S           | MAPK15 (ERK7)    | <i>Erk7</i>                                     | 0     | 0   | 0    | 0     | 0   |
|                                                   |       | M   | S           | MAP3K7 (TAK1)    | <i>Tak1</i>                                     | 3     | 8   | 2    | 3     | 4   |
| *                                                 |       | M   | S           | RPS6KA3 (p90RSK) | <i>S6kII</i>                                    | 0     | 8   | 4    | 0     | 7   |
| Chromosomes 2, 3 and 4                            |       |     |             |                  |                                                 |       |     |      |       |     |
|                                                   |       |     |             | control          | 28                                              | 48    | 52  | 3    | 5     | 9   |
| <i>Anti-target for sorafenib</i>                  |       |     |             |                  |                                                 |       |     |      |       |     |
|                                                   |       | M   |             | CSK              | <i>csk</i>                                      | 43    | 22  | 58   | 11    | 5   |
| <i>Anti-targets for LS1-15</i>                    |       |     |             |                  |                                                 |       |     |      |       |     |
| *                                                 |       |     | M           | STK38            | <i>trc</i>                                      | 3     | 34  | 14   | 1     | 12  |
| *                                                 |       |     | M           | MYO3A            | <i>ninaC</i>                                    | 14    | 48  | 25   | 2     | 3   |
| *                                                 |       |     | W           | MAP3K15 (ASK3)   | <i>Pk92B</i>                                    | 16    | 40  | 36   | 4     | 8   |
| <i>Anti-targets for both sorafenib and LS1-15</i> |       |     |             |                  |                                                 |       |     |      |       |     |
| *                                                 |       | S   | S           | PDPK1            | <i>Pdk1</i>                                     | 0     | 0   | 0    | 0     | 0   |
| *                                                 |       | S   | S           | HIPK2            | <i>hipk</i>                                     | 0     | 0   | 0    | 0     | 0   |
| *                                                 |       | S   | S           | TTK              | <i>Mps1</i>                                     | 1     | 0   | 0    | 1     | 0   |
| *                                                 |       | S   | S           | MKNK1            | <i>Lk6</i>                                      | 0     | 0   | 0    | 0     | 0   |
|                                                   |       | S   | M           | PAK3             | <i>Pak3</i>                                     | 14    | 6   | 20   | 8     | 4   |

### Supplementary Table 3: Anti-targets of sorafenib [1] and LS1-15 [4].

A list of genes whose heterozygosity caused statistically significant decrease in % viability of *ptc>dRet<sup>M955T</sup>* flies in the presence of drugs. Same legend as Supplementary Table 2 except for W, M, and S for genes on the X chromosome (weak [11-17% viability], moderate [6-10% viability], and strong [0-5% viability] effects, respectively) or 2nd, 3rd, and 4th chromosomes (weak [30-47% viability], moderate [10-29% viability], and strong effects [0-9% viability], respectively).



| kinase                   | sorafenib [1] | LS1-15 [4] | AP5-16-2 [9] | AP5-6-45 [10] | AP5-3-69-1 [5] | LS1-37 [6] | kinase                    | sorafenib [1] | LS1-15 [4] | AP5-16-2 [9] | AP5-6-45 [10] | AP5-3-69-1 [5] | LS1-37 [6] |
|--------------------------|---------------|------------|--------------|---------------|----------------|------------|---------------------------|---------------|------------|--------------|---------------|----------------|------------|
| ABL2 (Arg)               | 9             | 27         | 21           | 55            | 31             | 6          | MAPK14 (p38 alpha)        | 11            | 21         | 29           | 19            | 38             | 11         |
| ACVR1B (ALK4)            | -2            | 4          | 1            | -4            | 1              | 7          | MAPK14 (p38 alpha) Direct | 46            | 41         | 44           | 26            | 52             | 1          |
| AKT1 (PKB alpha)         | 5             | 4          | 2            | 0             | 2              | 3          | MAPK8 (JNK1)              | -30           | 2          | 6            | 8             | -9             | 6          |
| AMPK A1/B1/G1            | 5             | -4         | -4           | 0             | -6             | 1          | MAPK9 (JNK2)              | -15           | 32         | 7            | 10            | 7              | -3         |
| AMPK A2/B1/G1            | 12            | 4          | 5            | 9             | 1              | 7          | MUSK                      | 78            | 96         | 76           | 45            | 91             | 8          |
| AURKA (Aurora A)         | 6             | 8          | 2            | 8             | 11             | 2          | NTRK1 (TRKA)              | 29            | 71         | 52           | 47            | 64             | 6          |
| BMPR2                    | 3             | 0          | 2            | -4            | -4             | 7          | NUAK1 (ARK5)              | -11           | -1         | 2            | -4            | 5              | 6          |
| BRAF                     | 53            | 45         | 3            | 3             | 30             | 10         | PAK3                      | 8             | 7          | 2            | 6             | 17             | 28         |
| CAMK1D (CaMKII delta)    | -1            | 3          | 2            | 3             | 1              | 0          | PDGFRA (PDGFR alpha)      | 94            | 89         | 82           | 63            | 81             | 15         |
| CAMK2A (CaMKII alpha)    | 6             | -5         | -3           | 3             | -2             | 2          | PKD1 Direct               | -9            | 19         | -4           | 0             | 2              | 0          |
| CDC42 BPA (MRCKA)        | -6            | -3         | -10          | -3            | -12            | -3         | PKN1 (PRK1)               | -7            | 12         | 16           | 4             | -4             | 3          |
| CDK1/cyclin B            | 0             | -2         | -1           | 2             | 2              | 0          | PRKACA (PKA)              | -4            | 2          | 4            | 4             | -3             | 2          |
| CSK                      | -2            | 13         | 4            | 21            | 20             | 0          | PRKCA (PKC alpha)         | 26            | 1          | -6           | 1             | 3              | 1          |
| CSNK1A1 (CK1 alpha 1)    | 7             | 5          | -2           | 2             | 4              | 2          | PRKCB1 (PKC beta I)       | -4            | 10         | 3            | 6             | 8              | 12         |
| CSNK1E (CK1 epsilon)     | -1            | 3          | 4            | 11            | 1              | 0          | PRKG1                     | 0             | 6          | 3            | 1             | 1              | 0          |
| DDR2                     | 42            | 97         | 91           | 96            | 95             | 7          | PRKG2 (PKG2)              | 10            | 4          | -2           | 1             | -3             | -1         |
| DYRK1A                   | 0             | -7         | 2            | 3             | 3              | 0          | PTK2 (FAK)                | 10            | 8          | 6            | 8             | 4              | 7          |
| DYRK1B                   | -2            | -3         | -1           | 0             | -2             | -2         | PTK2B (FAK2)              | -2            | -3         | -2           | 7             | -7             | 1          |
| EGFR (ErbB1)             | 6             | 0          | -7           | 3             | -2             | 1          | PTK6 (Brk)                | -4            | 25         | 20           | 14            | 44             | 6          |
| EPHA2                    | 21            | 93         | 53           | 13            | 59             | 10         | RET                       | 94            | 100        | 92           | 52            | 102            | 3          |
| FER                      | 15            | -2         | -2           | 8             | 0              | -4         | RET M918T                 | 101           | 99         | 92           | 84            | 100            | 3          |
| FGFR1                    | 14            | 8          | 15           | 9             | 15             | 4          | ROCK1                     | -10           | 2          | 4            | -5            | 5              | 3          |
| FLT1 (VEGFR1)            | 62            | 62         | 45           | 24            | 74             | -12        | ROS1                      | -1            | 15         | 2            | 7             | 10             | -5         |
| FRAP1 (mTOR)             | -3            | -7         | -10          | 3             | -4             | -1         | RPS6KA3 (RSK2)            | 11            | -3         | 0            | 0             | -3             | 1          |
| FRK (PTK5)               | 19            | 79         | 72           | 55            | 56             | 8          | RPS6KA5 (MSK1)            | 0             | 5          | 5            | 6             | 4              | -1         |
| FYN                      | -4            | 12         | 6            | 7             | 17             | 8          | RPS6KB1 (p70S6K)          | -9            | 1          | 11           | 6             | 5              | -4         |
| HCK                      | -1            | 24         | 20           | 24            | 35             | 2          | SGK (SGK1)                | 9             | -1         | 4            | 4             | 5              | 3          |
| HIPK2                    | 8             | 6          | 8            | 5             | 6              | 2          | SRC                       | 3             | 14         | 12           | 13            | 23             | 3          |
| IKKB (IKK beta)          | 1             | -1         | -3           | 3             | -7             | -3         | SRPK1                     | 1             | 2          | -1           | -1            | 2              | 2          |
| INSR                     | 3             | 5          | 0            | 4             | 2              | -2         | SRPK2                     | -6            | 9          | 2            | -3            | 2              | 3          |
| JAK2                     | 2             | 24         | 5            | 3             | 25             | 2          | SYK                       | 2             | 7          | 1            | -9            | 0              | 3          |
| KIT                      | 49            | 32         | 2            | 1             | 21             | 16         | TAOK2 (TAO1)              | 22            | 8          | 15           | 18            | 2              | -10        |
| LCK                      | 18            | 33         | 22           | 39            | 58             | 14         | TGFBR1 (ALK5)             | 2             | 1          | 6            | -2            | 3              | -3         |
| LIHK1                    | 45            | 6          | 0            | 3             | 11             | -2         | TNK2 (ACK)                | 1             | -4         | -3           | 3             | -2             | -2         |
| LRRK2                    | 9             | 25         | 22           | 24            | 21             | 18         | WEE1                      | -3            | -4         | -2           | -3            | -4             | -5         |
| MAP2K1 (MEK1)            | 0             | -7         | -1           | 9             | -5             | -6         | YES1                      | 4             | 16         | 15           | 14            | 25             | 0          |
| MAP2K6 (MKK6)            | 17            | 32         | 52           | 30            | 21             | 7          |                           |               |            |              |               |                |            |
| MAP3K7/3/1P1 (TAK1-TAB1) | 35            | 31         | 58           | 79            | 44             | -11        |                           |               |            |              |               |                |            |
| MAP3K8 (COT)             | 6             | 12         | 10           | 12            | 7              | 13         |                           |               |            |              |               |                |            |
| MAP4K4 (HGK)             | 17            | 4          | -2           | 49            | 3              | 12         |                           |               |            |              |               |                |            |

|        |
|--------|
| 81-100 |
| 41-80  |
| 0-40   |

### Supplementary Table 4: *In vitro* inhibition data for kinases.

Percent *in vitro* inhibition of human kinase activities by TCIs. Red, greater than 80% inhibition. White, 41-80% inhibition. Blue, less than 40% inhibition.

| Category            | Parameter                                | Description                                                                               |
|---------------------|------------------------------------------|-------------------------------------------------------------------------------------------|
| Assay               | Type of assay                            | Whole organism                                                                            |
|                     | Target                                   | Kinases                                                                                   |
|                     | Primary measurement                      | Fly viability                                                                             |
|                     | Key reagents                             | Semi-defined fly medium (BDSC), DMSO (SIGMA-Aldrich)                                      |
|                     | Assay protocol                           | See "Fly assays" in Methods                                                               |
|                     | Additional comments                      |                                                                                           |
| Library             | Library size                             | 31 FDA drugs and 30 in-house chemicals                                                    |
|                     | Library composition                      | FDA-approved drugs and drug candidates                                                    |
|                     | Source                                   | Selleck, LC laboratories, Tocris Bioscience, and in-house                                 |
|                     | Additional comments                      |                                                                                           |
| Screen              | Format                                   | Fly culture vials                                                                         |
|                     | Concentration(s) tested                  | 1 to up to 800 $\mu$ M in 0.1% DMSO                                                       |
|                     | Plate controls                           | not applicable                                                                            |
|                     | Reagent/ compound dispensing system      | not applicable                                                                            |
|                     | Detection instrument and software        | not applicable                                                                            |
|                     | Assay validation/QC                      | not applicable                                                                            |
|                     | Correction factors                       | not applicable                                                                            |
|                     | Normalization                            | not applicable                                                                            |
| Additional comments |                                          |                                                                                           |
| Post-HTS analysis   | Hit criteria                             | Rescue of lethality compared with DMSO control or sorafenib                               |
|                     | Hit rate                                 | not applicable                                                                            |
|                     | Additional assay(s)                      | Validation using cultured human MTC cells                                                 |
|                     | Confirmation of hit purity and structure | Validated by LC-MS and $^1$ H NMR (See "Synthetic Methods and Compound Characterization") |
|                     | Additional comments                      |                                                                                           |

**Supplementary Table 5: Small molecule screening data.**

Figure S1

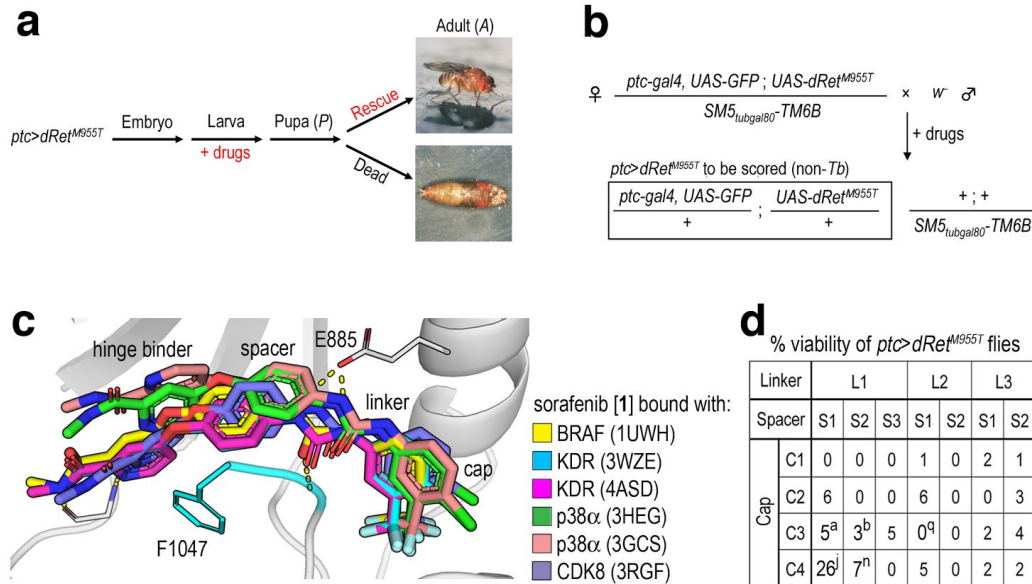

**Supplementary Fig. 1: Determining the effects of inhibitors in *Drosophila* MTC model.**

**a**, Scheme showing quantitative ‘rescue-from-lethality’ *Drosophila* platform used for drug and compound screening. In  $ptc>dRet^{M955T}$  flies, the *patched* (*ptc*) promoter drives an oncogenic mutant isoform of *Drosophila Ret* ( $dRet^{M955T}$ ) in several tissues, directing lethality prior to emergence as adults. Larvae consume candidate drugs; drug efficacy is quantified by dividing the number of rescued adults (*A*) by the number of total pupae (*P*).

**b**, Scheme showing preparation of  $ptc>dRet^{M955T}$  flies. In  $ptc-gal4, UAS-GFP; UAS-dRet^{M955T}/SM5_{tub-gal80}-TM6B$  flies, *tubulin* promoter-driven GAL80 suppressed GAL4 activity to suppress  $dRet^{M955T}$  expression. For drug screening, these flies were crossed with  $w^r$  flies to create non-*Tb*, oncogenic  $ptc-gal4, UAS-GFP; UAS-dRet^{M955T}$  ( $ptc>dRet^{M955T}$ ) flies that were morphologically distinguishable from *Tb* control flies at the pupal stage. Fly progenies were treated with or without drugs, and raised at 25°C.

**c**, The conformations of **1** when bound to various kinases in the DFG-out (*i.e.* inactive) conformation (gray); PDB ID of the shown structures is listed in parentheses. For example, when bound to BRAF, **1** (yellow version) interacts with the hinge region of the ATP-binding pocket and a conserved glutamate residue from the C-helix (E885) using hinge binder and linker regions, respectively. The cap group of **1** occupies the DFG-out pocket, which is created by movement of the phenylalanine (F1047) from the DFG-in (*i.e.* active) conformation.

**d**, Rescue of  $ptc>dRet^{M955T}$  flies by TCIs. The chemical structures for tested compounds within the matrix is denoted based on linker (L1-L3), spacer (S1-S3), and caps (C1-C4) as shown in Fig. 2a. Lower case letters correspond to viability data as shown in Supplementary Figs. 2a and 2b. LS1-15 [**4**] (**j**) rescued viability significantly better than sorafenib [**1**] (**a**) and regorafenib [**2**] (**b**).

Figure S2

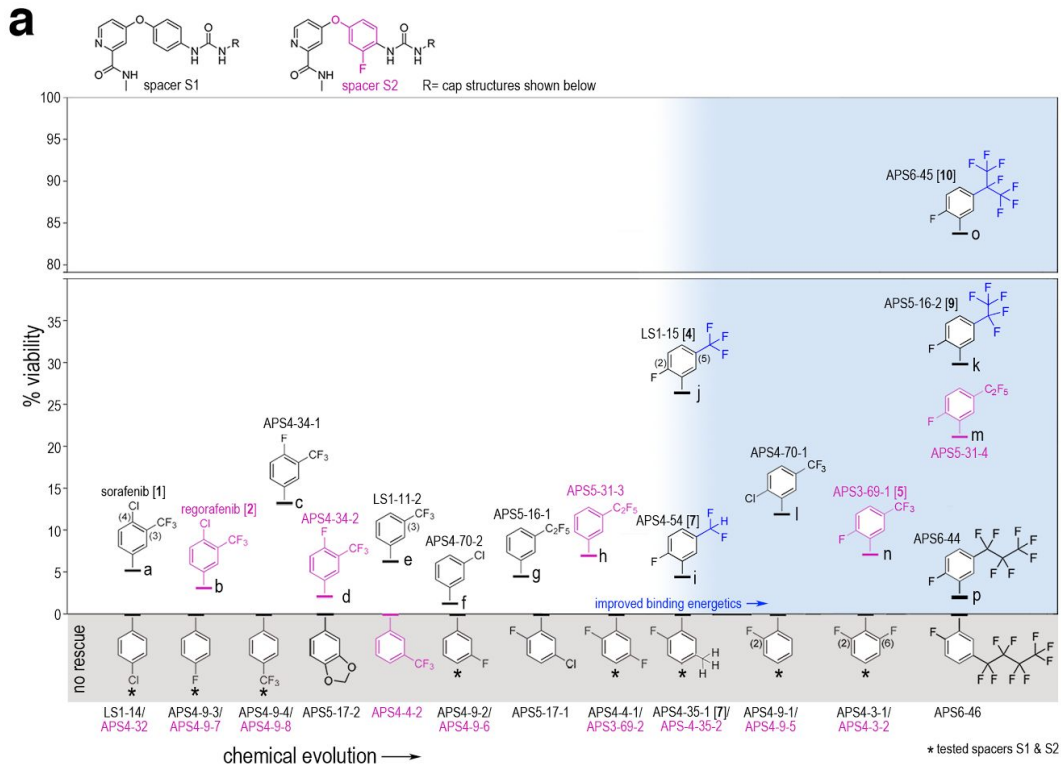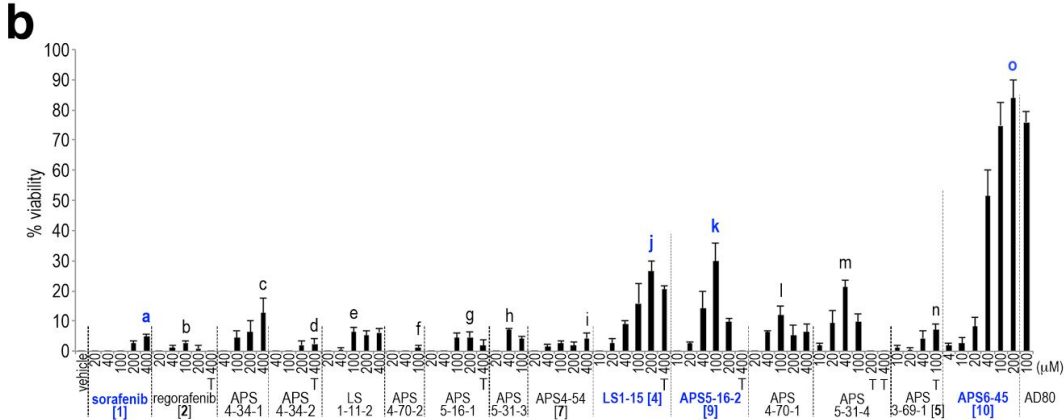

**Supplementary Fig. 2: Extended description of the terminal cap group SAR.**

**a**, Rescue of *ptc>dRet<sup>M955T</sup>* flies by TCIs. Additional, specific compound designations correspond to the synthetic procedures in the Methods section, and those highlighted in magenta possess spacer S2; see also Fig. 4a. APS5-16-2 carrying the  $-C_2F_5$  group within the cap showed significant rescue (**k**), whereas APS6-45, with the  $-isoC_3F_7$  substitution, shows the strongest efficacy (**o**) exceeding AD80. The lowercase letters (**a-o**) correspond to the dosing plots shown in **b**.

**b**, Dose response to TCIs. T, toxic dose for flies. Error bars, standard errors in triplicate.

# Figure S3

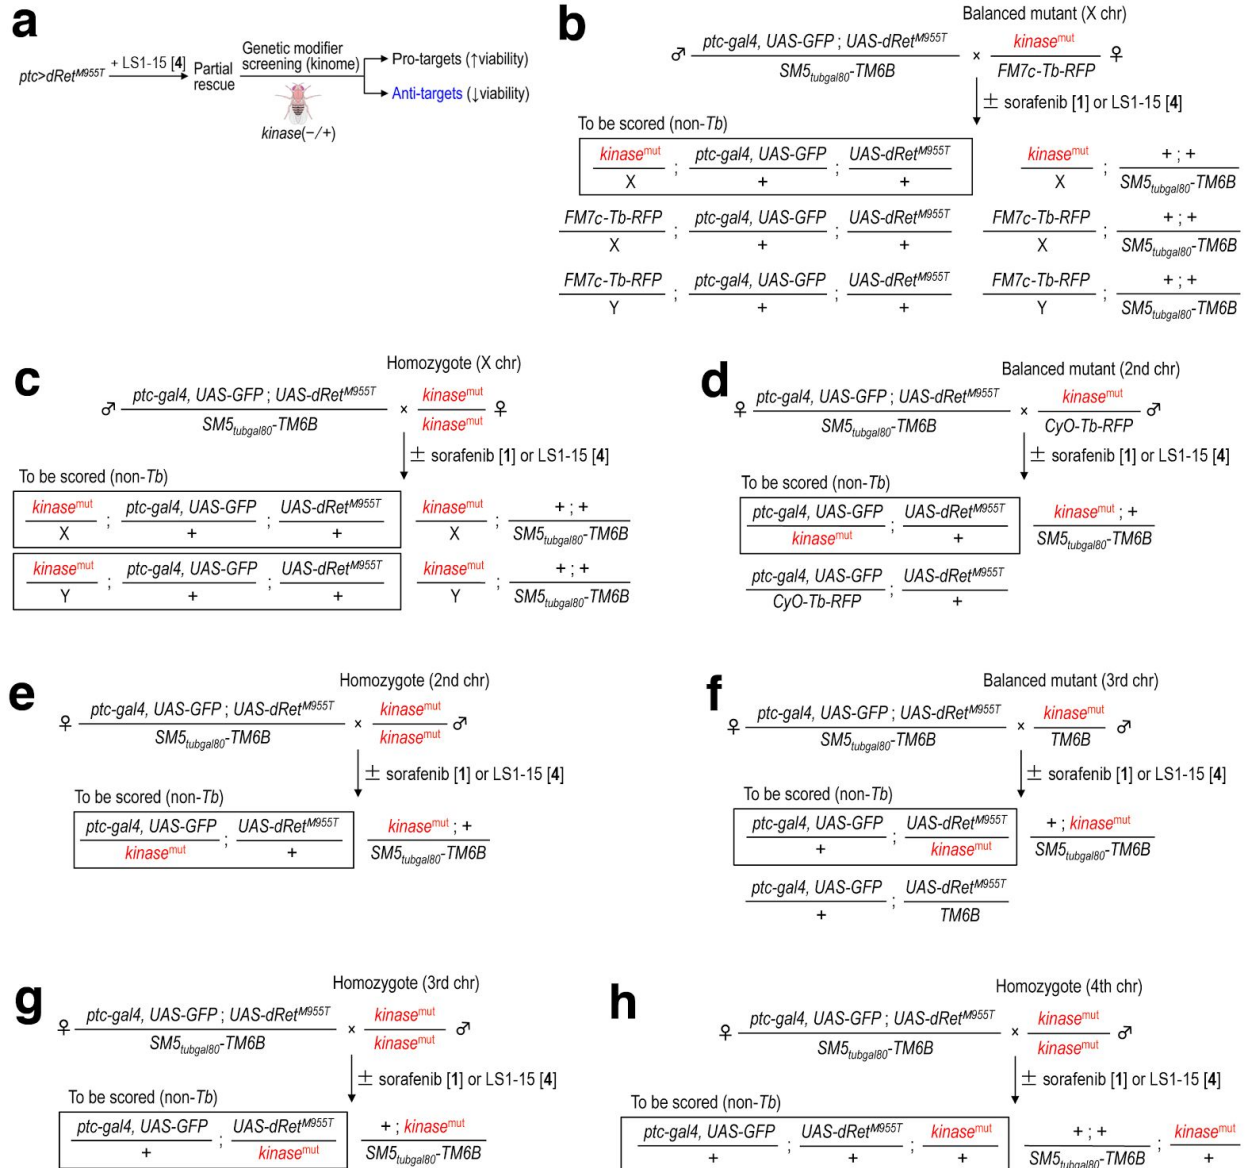

**Supplementary Fig. 3: Determining the effects of heterozygosity of kinase genes in *Drosophila* MTC model.**

**a**, Scheme showing screening approach to identify genetic modifiers of 4 efficacy in *ptc > dRet<sup>M955T</sup>* flies. Fly kinome genes were identified as "pro-targets" or "anti-targets" if—as whole animal heterozygotes (*ptc > dRet<sup>M955T</sup>, gene<sup>-/+</sup>*)—they increased or decreased, respectively, the efficacy of 4.

**b-h**, Generating experimental flies. *ptc>dRet<sup>M955T</sup>* flies are crossed with flies mutant for a kinase gene on either X (**b, c**), 2nd (**d, e**), 3rd (**f, g**), or 4th (**h**) chromosomes, and their progenies were raised on fly food with or without drugs at 23°C. Mutant alleles in parent flies are either balanced with *Tb* allele (**b, d, f**), or homozygous (**c, e, g, h**).



Figure S4

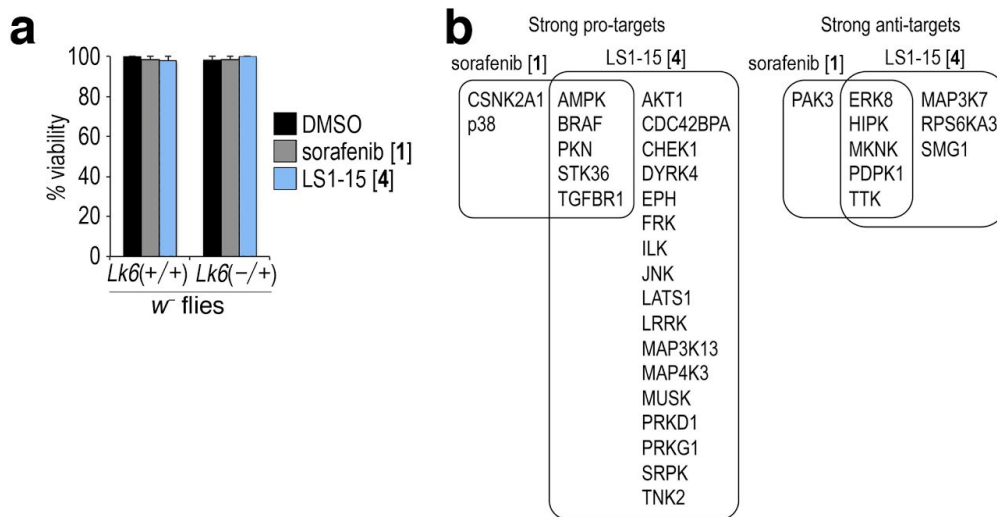

**Supplementary Fig. 4: Shared and specific pro-targets and anti-targets.**

**a**, *Lk6* heterozygosity had no effect on viability of control flies. Control (*w<sup>-</sup>*) or *Lk6* heterozygous (*w<sup>-</sup>;Lk6<sup>-/+</sup>*) larvae were treated with or without drugs, and cultured at 23°C. Percent viability was determined using numbers of pupae and adults. Error bars, standard errors in triplicate.

**b**, Venn diagrams showing pro-targets and anti-targets for **1** and/or **4**. Shown are strong pro-targets and strong anti-targets in which heterozygosity gave rise to > 91% and < 9% viability to *ptc>dRet<sup>M955T</sup>* flies, respectively, in the presence of compounds at 23°C.

# A Receptor kinase/PI3K/MAPK pathways

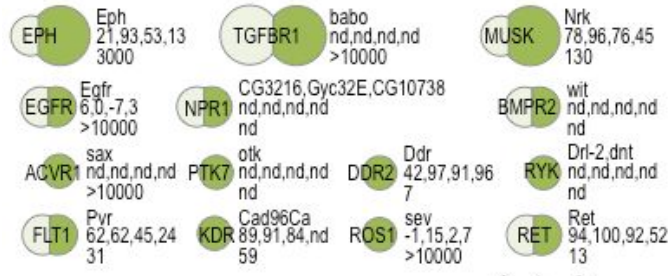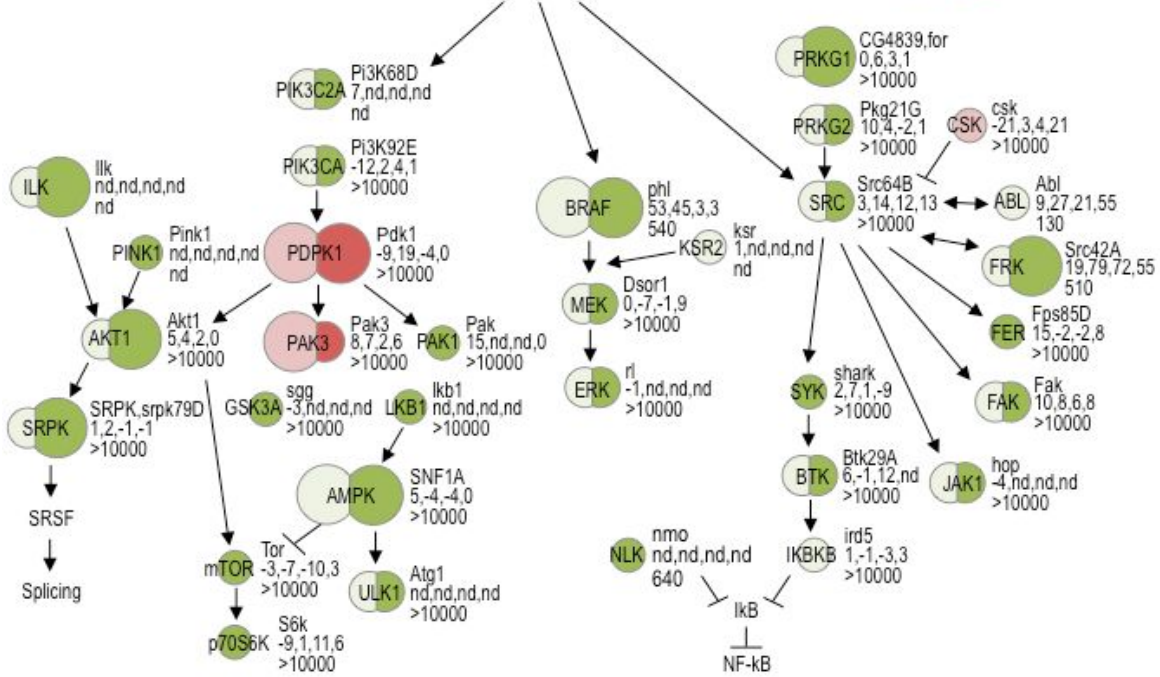

# B SAPK pathway

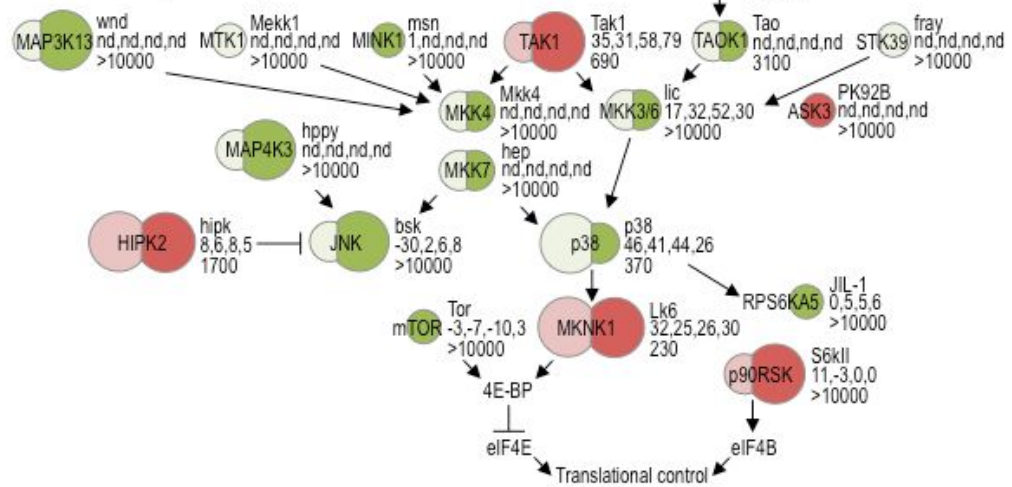

### C Cytoskeleton regulation

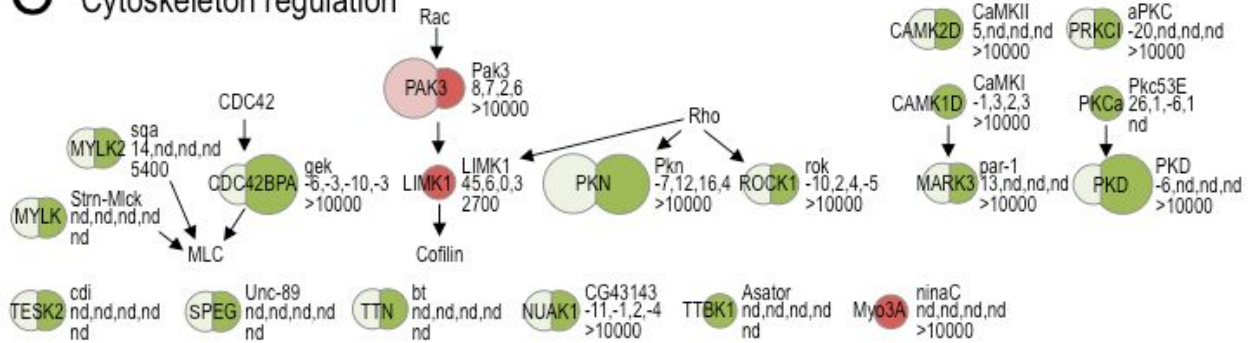

### D Genome integrity/ gene expression

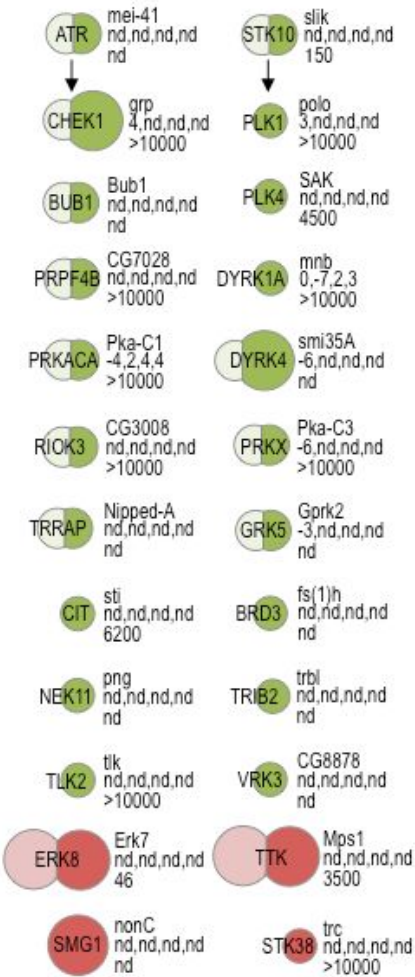

### E Cell cycle

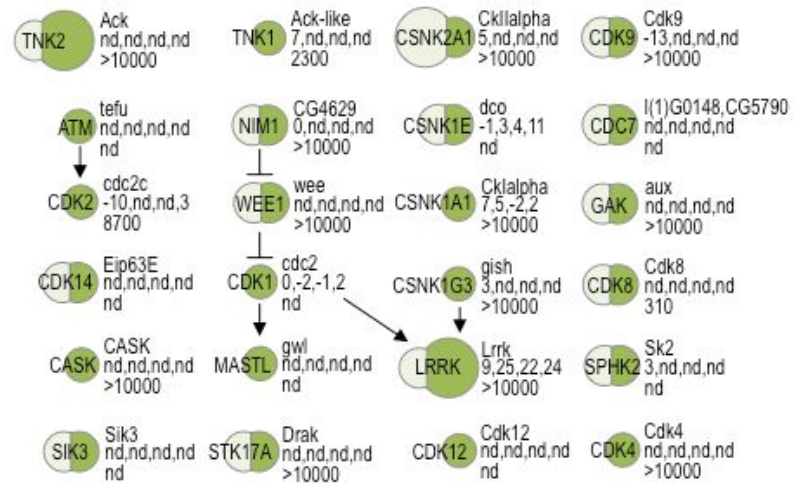

### F Others

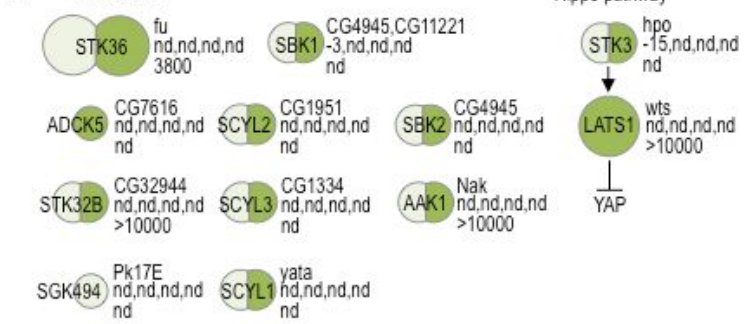

**Supplementary Fig. 5: Pro-targets and anti-targets of sorafenib [1] and LS1-15 [4].**

Pro-targets and anti-targets of **1** and **4** were grouped into receptor kinase/phosphoinositide 3-kinase (PI3K)/MAPK (**A**), stress (**B**), cytoskeleton (**C**), genome integrity/gene expression (**D**), cell cycle (**E**), or other signaling pathways (**F**) according to their functions. Pale green and dark green circles indicate pro-targets of **1** and **4**, respectively, whereas pink and red circles indicate anti-targets of **1** and **4**, respectively. Small and large circles indicate weak/medium and strong modifiers of compound efficacy in *ptc>dRet<sup>M955T</sup>* flies, respectively. Percent inhibition of each kinase by TCIs and Kd value by **1** (ref. <sup>10</sup>) are also shown. Soraf, sorafenib [**1**]; L15, LS1-15 [**4**]; A5, APS5-16-2 [**9**]; A6, APS6-45 [**10**].

Figure S6

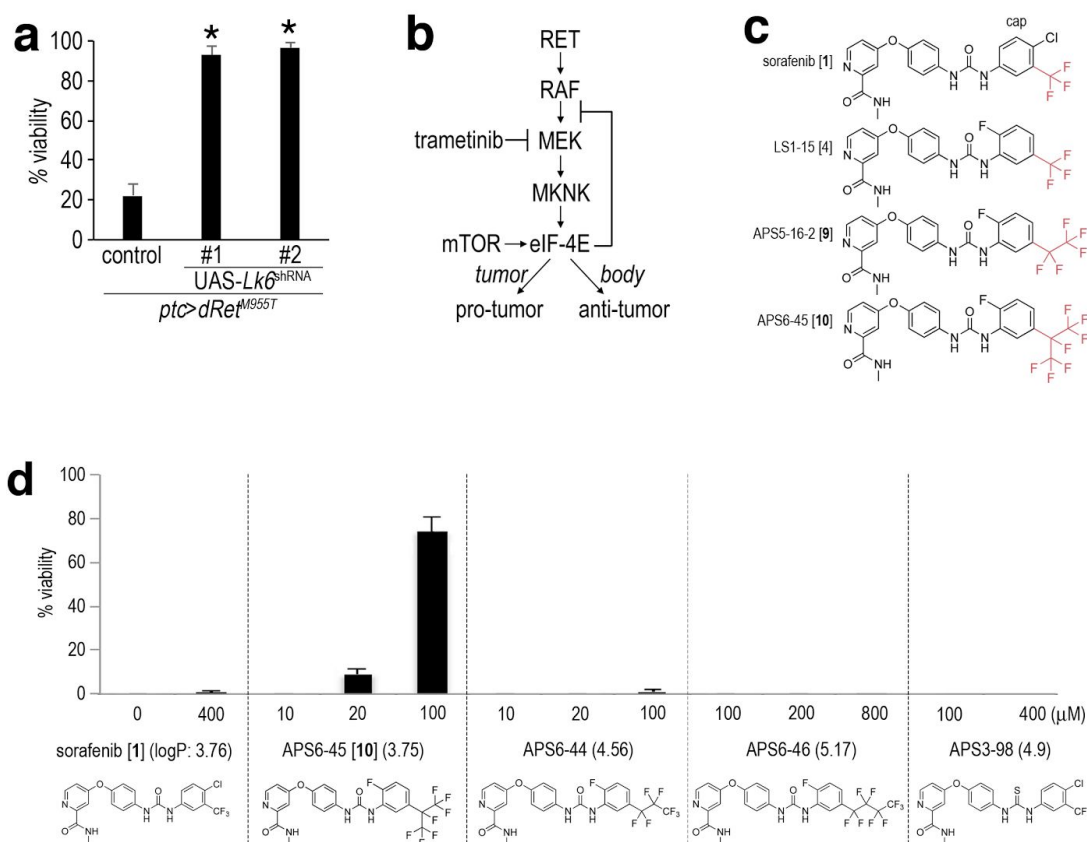

**Supplementary Fig. 6: Derivatives of sorafenib [1].**

**a**, *Lk6* knockdown specifically in *dRet*<sup>M955T</sup> cells increases the viability of *ptc>dRet*<sup>M955T</sup> flies. Two different sequences (#1 and #2) were driven by the *ptc* promoter to knock down *Lk6* expression. Error bars, standard errors in triplicate. Asterisks,  $p < 0.05$  in Student's *t*-test as compared with no-shRNA control.

**b**, A model of MKNK inhibition of RAS/MAPK pathway signaling.

**c**, The TCIs **9** and **10** possess extended perfluoroalkyl group substitutions relative to **1** and **4** (red).

**d**, Comparing efficacy and logP values (parentheses) for **1** and several of the TCIs, demonstrating poor correlation between the two parameters.



Figure S7

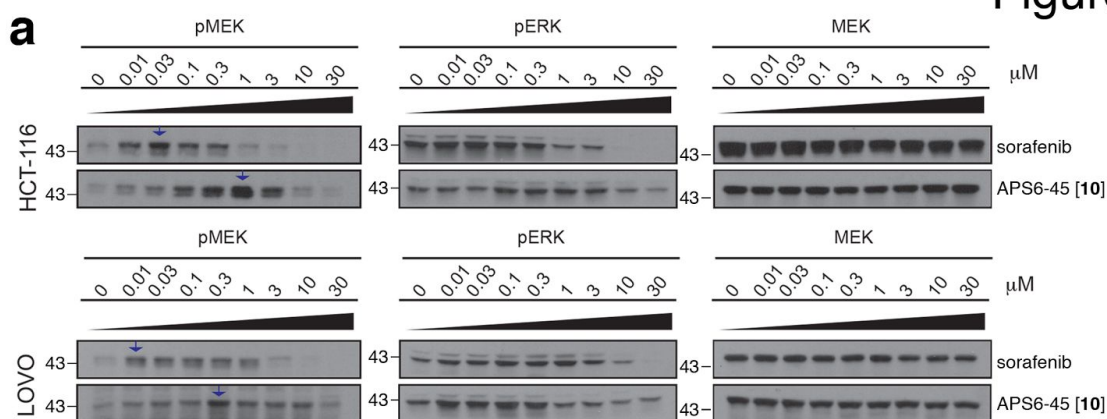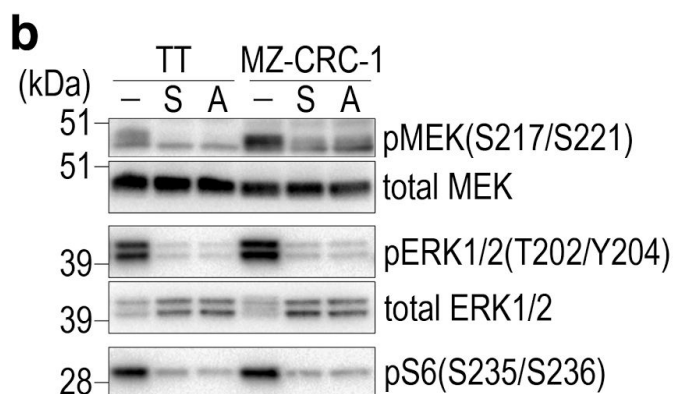

**c**

| Compound     | MTD (mg/kg/day) | PK           |                      |                      |                       |                            |                           |                        |
|--------------|-----------------|--------------|----------------------|----------------------|-----------------------|----------------------------|---------------------------|------------------------|
|              |                 | Dose (mg/kg) | T <sub>1/2</sub> (h) | T <sub>max</sub> (h) | C <sub>max</sub> (μM) | AUC <sub>0-24</sub> (μM·h) | AUC <sub>0-∞</sub> (μM·h) | MRT <sub>0-∞</sub> (h) |
| APS6-45 [10] | 160 <           | 20           | 5.6                  | 2.0                  | 9.7                   | 123.7                      | 131.8                     | 9.3                    |

**Supplementary Fig. 7: Effects of APS6-45 [10] on Ras/MAPK signaling in human cancer cells.**

**a**, Human cancer cell lines HCT-116 and LOVO were treated with the indicated doses of **1** and **10**, and the effects on Ras/MAPK signaling were measured by western blot using pMEK(S217/S221) and pERK(T202/Y204) antibodies. Peak transactivation of BRAF by **1** (ref. <sup>38</sup>) and **10** are indicated by arrows. Uncropped images are in Supplementary Fig. 8a.

**b**, **10** inhibited Ras pathway activity in human MTC cells. TT and MZ-CRC-1 were treated with vehicle (-), 1 μM of sorafenib [**1**] (S), or 1 μM of APS6-45 [**10**] (A) for 1 h, and cell lysates were analyzed for activity of the Ras/MAPK pathway effectors MEK, ERK, and S6. Uncropped images are in Supplementary Fig. 8b.

**c**, Maximum tolerated dose (MTD) and pharmacokinetics (PK) of **10** in mice. For PK test, mice were dosed with 20 mg/kg of **10** orally.



Figure S8

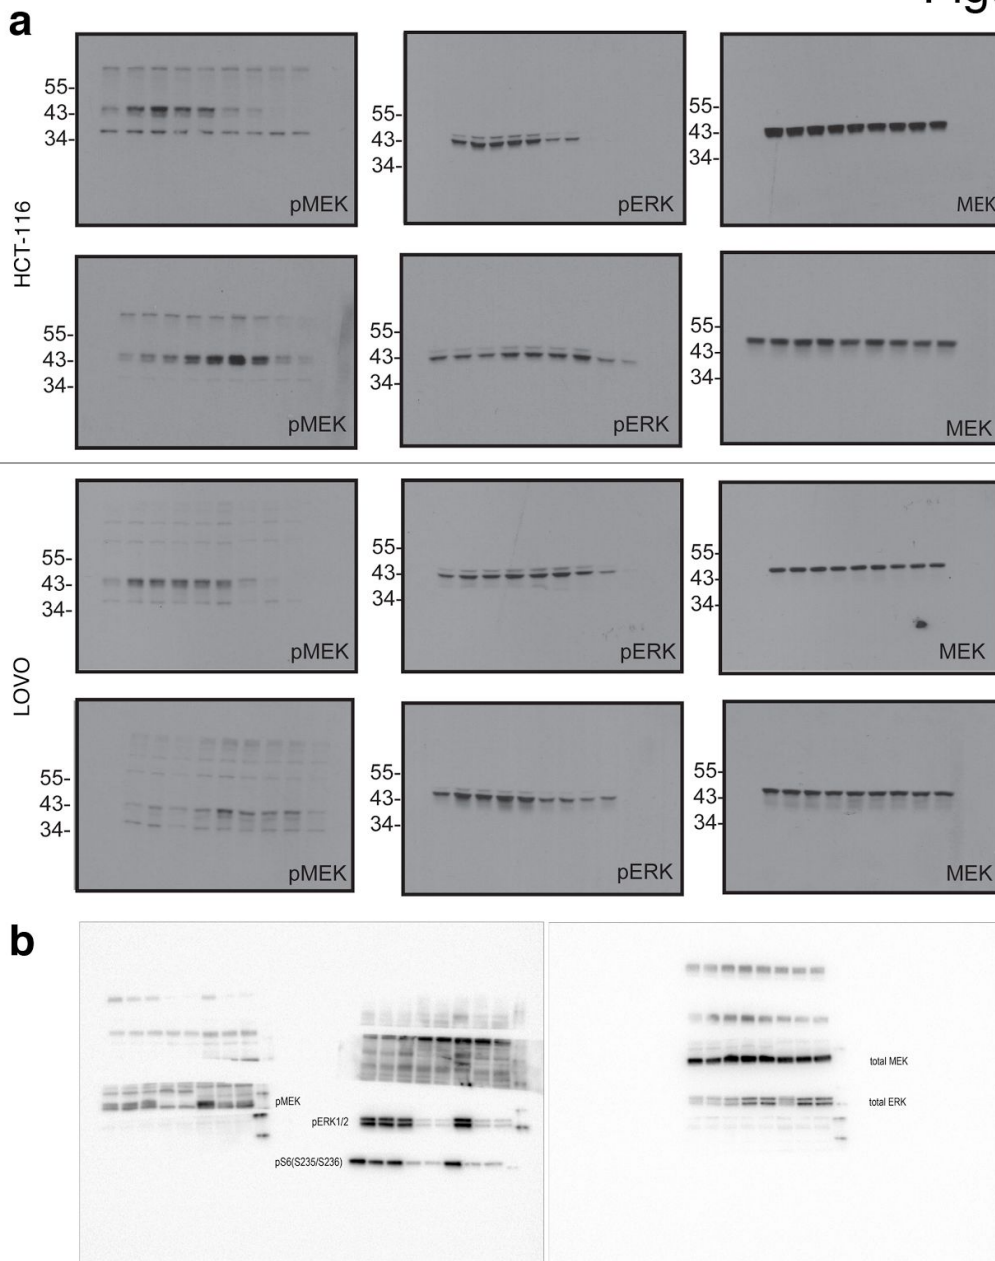

**Supplementary Fig. 8: Uncropped western images.**

**a and b**, Original images for Supplementary Figs. 7a and 7b, respectively.

Figure S9

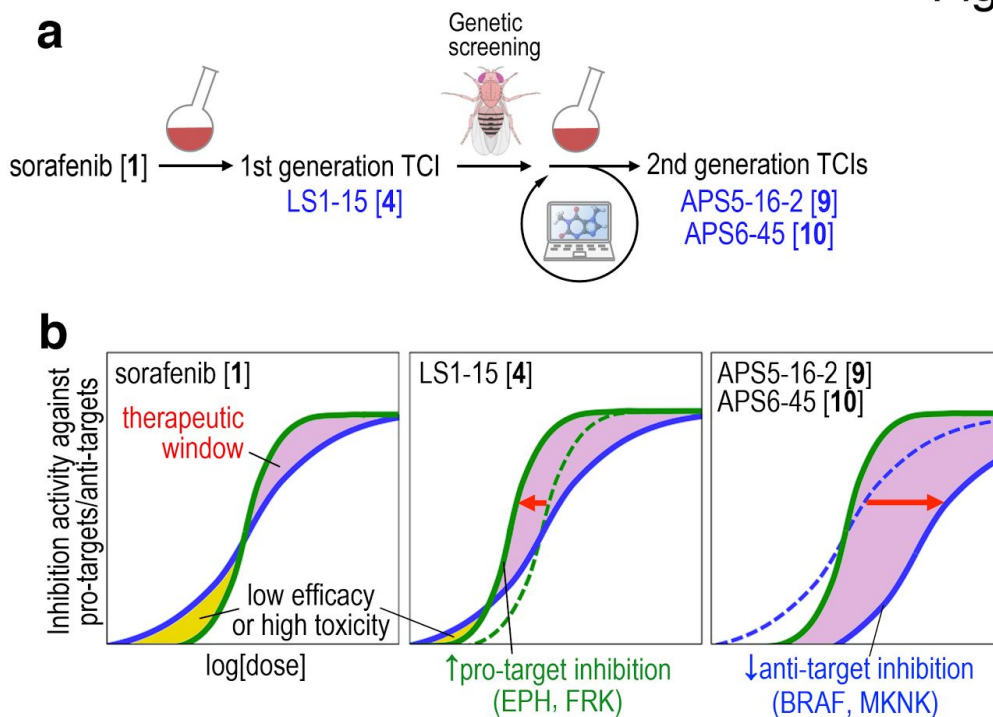

**Supplementary Fig. 9: Optimizing polypharmacology.**

**a**, Scheme showing stepwise derivatization of TCIs. The first set of TCIs includes combinations between spacers/linkers/caps generated by medicinal chemistry. Drug screening experiments with *ptc>dRet<sup>M955T</sup>* flies identified **4** as the best derivative; subsequent genetic screening revealed pro-targets and anti-targets for **1** and **4**. Computation compared physicochemical features between compounds such as intramolecular steric hindrance and modifications of the cap to prevent its binding to anti-targets, pointing to novel chemical spaces **9** and **10**.

**b**, Models for mechanism of action of each TCI.

(Left) **1** inhibits pro-targets such as RET (green). At low dose, however, such inhibition is not sufficiently potent to overcome anti-targets such as BRAF (yellow). Such unwanted effects are reduced but not abolished at higher concentration; in addition, inhibition of anti-targets (blue) further limits the therapeutic window (pink).

(Middle) **4** inhibits additional pro-targets EPH and FRK, generating a larger therapeutic window than **1**. **4** at low dose is still limited by toxicity because it activates BRAF as **1** does.

(Right) **9** and **10** displayed reduced binding potency to BRAF, thus preventing activation of these anti-targets even at low dose. Other anti-targets such as MKNK are also kept uninhibited, leading to a wider therapeutic window than **1**.

# Figure S10

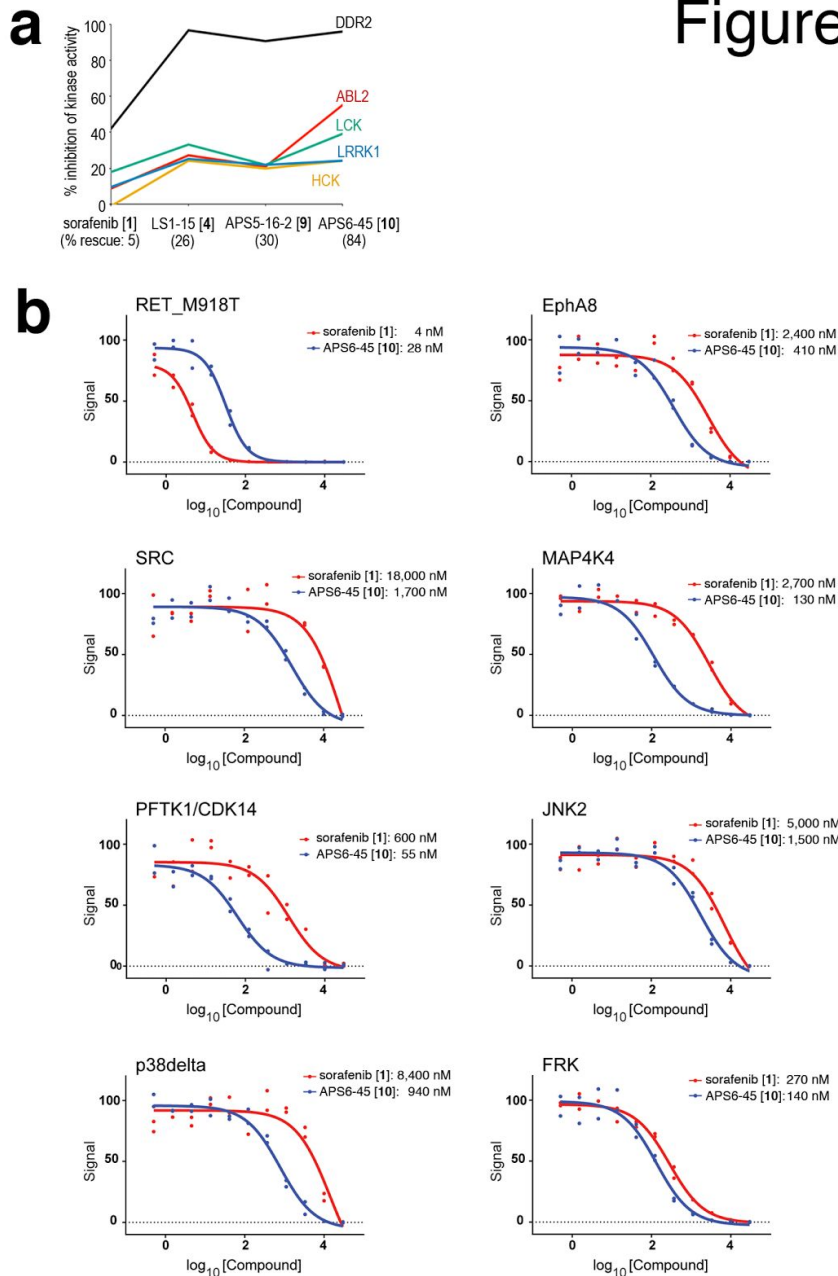

## Supplementary Fig. 10: Increased activity of APS6-45 [10] against pro-targets of sorafenib [1].

**a**, Distinct inhibition of pro-target kinases by TCIs. Percent inhibition of kinase activities were determined by *in vitro* assays. Percent rescue of *ptc>dRet<sup>M955T</sup>* flies by each compound is shown (parentheses). Note that LRRK1 is a strong pro-target, whereas ABL2, DDR2, HCK, and LCK are weak to moderate pro-targets (Supplementary Table 2).

**b**, Kd values determined by multi-point assays for **1** and **10** against pro-target kinases of **1**.

Figure S11

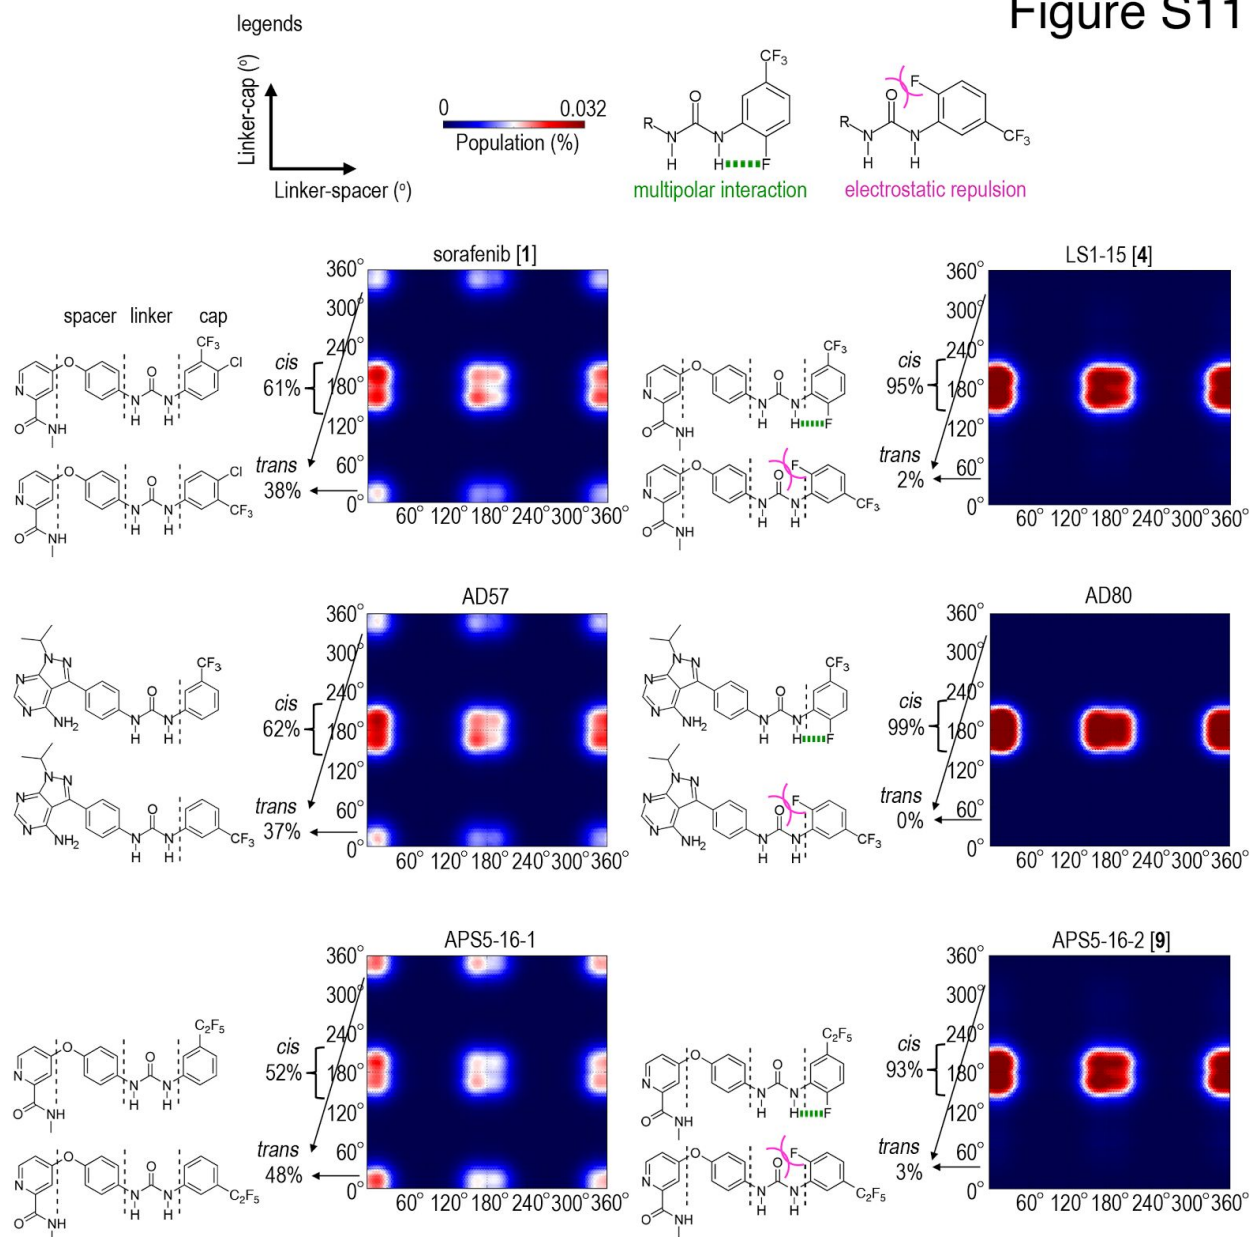

### Supplementary Fig. 11. Computing physicochemical features for TCIs.

Torsional energy of the linker/cap and linker/spacer is converted into relative conformational population of the compounds, represented in a heatmap. Since most TCIs do not have a substituent on the spacer region, linker/spacer is symmetric at 180°. **1**, APS5-16-1, and AD57 have two predominant conformational populations, the *cis*- and the *trans*- conformers, likely due to the rotation of the linker/cap. Conversely, **4**, **9**, and AD80 strongly favor the *cis*- over the *trans*- conformation, likely due to the multipolar interaction between the urea amide hydrogen and fluorine (green broken line), and strong electrostatic repulsion between the fluorine and the urea carbonyl oxygen in the *trans*- conformation (magenta arcs).

**Supplementary Dataset 1: *In vitro* inhibition of kinases by APS6-45 [10].**

Percent *in vitro* activity remaining for human kinases was determined in the presence of 10  $\mu$ M of **10**.

**Supplementary Dataset 2: Numbers of samples.**
